# Supplementary material for: Exploring the hydrophobic channel of NNIBP leads to the discovery of novel piperidine-substituted thiophene[3,2-d]pyrimidine derivatives as potent HIV-1 NNRTIs
Source: PubMed Central journal article supplement — Acta Pharm Sin B. 2019 Sep 14;10(5):878–94. doi: 10.1016/j.apsb.2019.08.013 (PMC7280082; doi:10.1016/j.apsb.2019.08.013), 2019-09-14

## Supporting Information for

### Original article

# Exploring the hydrophobic channel of NNIBP leads to the discovery of novel piperidine-substituted thiophene[3,2-*d*]pyrimidine derivatives as potent HIV-1 NNRTIs

**Dongwei Kang<sup>a</sup>, Da Feng<sup>a</sup>, Tiziana Ginex<sup>c</sup>, Jinmi Zou<sup>a</sup>, Fenju Wei<sup>a</sup>, Tong Zhao<sup>a</sup>, Boshi Huang<sup>a</sup>, Yanying Sun<sup>a</sup>, Samuel Desta<sup>a</sup>, Erik De Clercq<sup>b</sup>, Christophe Pannecouque<sup>b</sup>, Peng Zhan<sup>a,\*</sup>, Xinyong Liu<sup>a,\*</sup>**

<sup>a</sup>*Department of Medicinal Chemistry, Key Laboratory of Chemical Biology, Ministry of Education, School of Pharmaceutical Sciences, Shandong University, Jinan 250012, China*

<sup>b</sup>*Rega Institute for Medical Research, Laboratory of Virology and Chemotherapy, K.U. Leuven, Leuven B-3000, Belgium*

<sup>c</sup>*Department of Nutrition, Food Science and Gastronomy, Faculty of Pharmacy, Campus Torribera, Institute of Biomedicine and Institute of Theoretical and Computational Chemistry, University of Barcelona, Santa Coloma de Gramenet 08921, Spain*

Received 14 May 2019; received in revised form 25 July 2019; accepted 25 August 2019

\*Corresponding authors. Tel./fax: +86 531 88380270.

E-mail addresses: zhanpeng1982@sdu.edu.cn (Peng Zhan), xinyongl@sdu.edu.cn (Xinyong Liu).

## 1. Molecular modelling studies

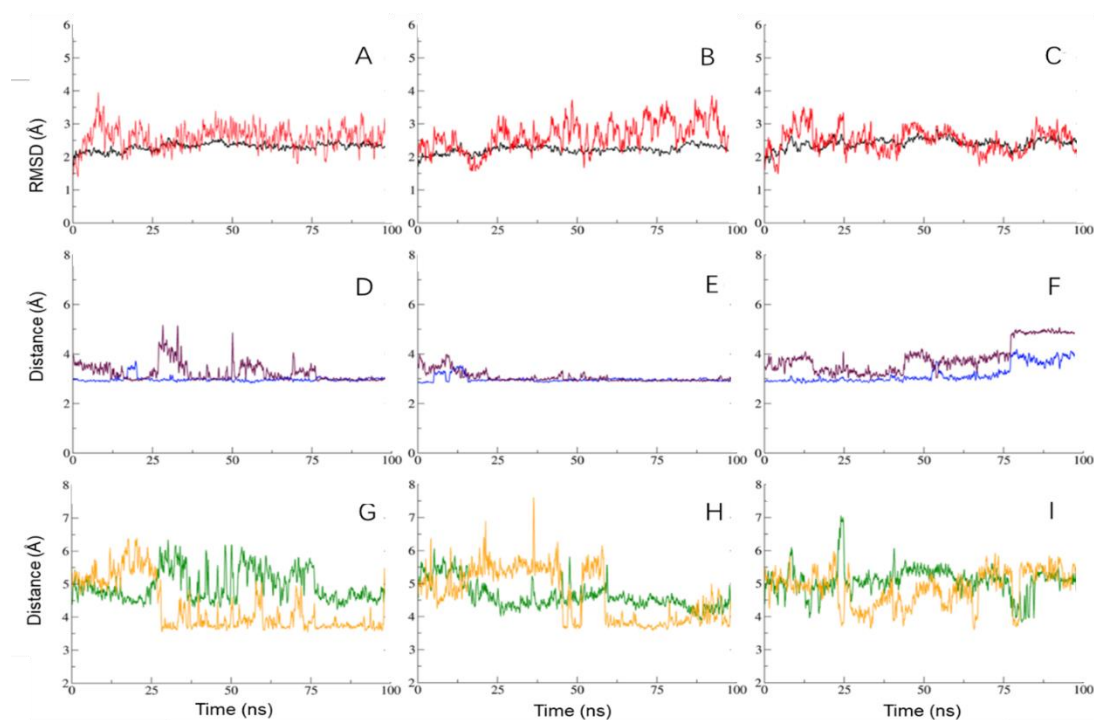

**Figure S1** Root mean square deviation (RMSD; Å) and distance (Å) analyses for **26** in complex with the WT (A, D, and G), the single K103N (B, E and H) and the double RES056 (C, F and I) RT. RMSD for the protein residues in close proximity of the ligand (8 Å), and for the ligand are shown respectively in black and red. Distances for the hydrogen-bonding (measured as N–O distance) interactions involving the –NH guanidine moiety of **26** and the backbone oxygen of K101, and for the protonated nitrogen of **26** and the backbone oxygen of K/N103 (measured as N–O distance) are highlighted in blue and brown, respectively. Finally, distances for the  $\pi$ -stacking formed between the benzonitrile moiety of **26** and residues Y181 (in green) and F227 (in orange) are also reported.

**Table S1** The corresponding list of compounds name in article and HPLC spectra.

| Compd.    | Compd. ID in spectra | Compd.    | Compd. ID in spectra |
|-----------|----------------------|-----------|----------------------|
| <b>11</b> | KDL17                | <b>22</b> | KDL31                |
| <b>12</b> | KDL19                | <b>23</b> | KDL37                |
| <b>13</b> | KDL33                | <b>24</b> | KDL39                |
| <b>14</b> | KDL35                | <b>25</b> | KDL41                |
| <b>15</b> | KDL79                | <b>26</b> | KDL43                |
| <b>16</b> | KDL81                | <b>27</b> | KDL45                |
| <b>17</b> | KDL25                | <b>28</b> | KDL47                |
| <b>18</b> | KDL27                | <b>29</b> | KDL71                |
| <b>19</b> | KDL21                | <b>30</b> | KDL73                |
| <b>20</b> | KDL23                | <b>31</b> | KDL75                |
| <b>21</b> | KDL29                | <b>32</b> | KDL77                |

## 2. High resolution mass spectrum

### Compound 11

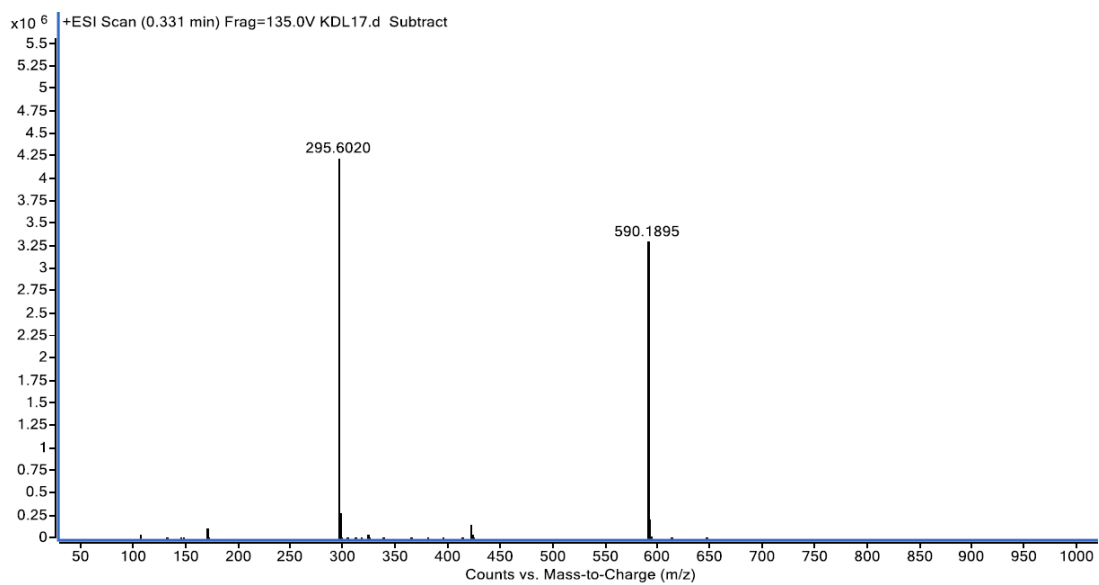

### Compound 12

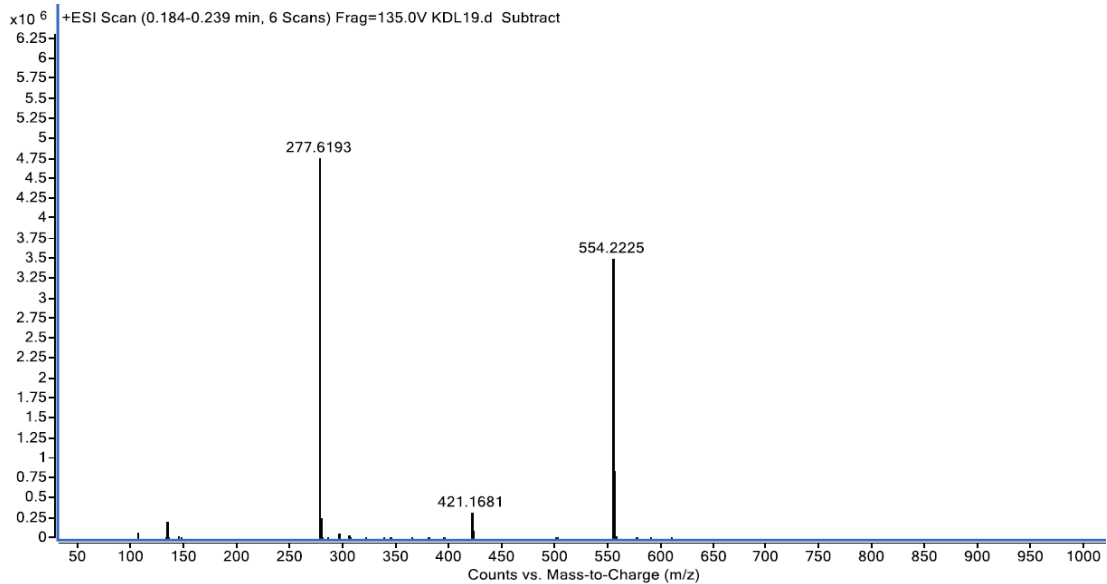

## Compound 13

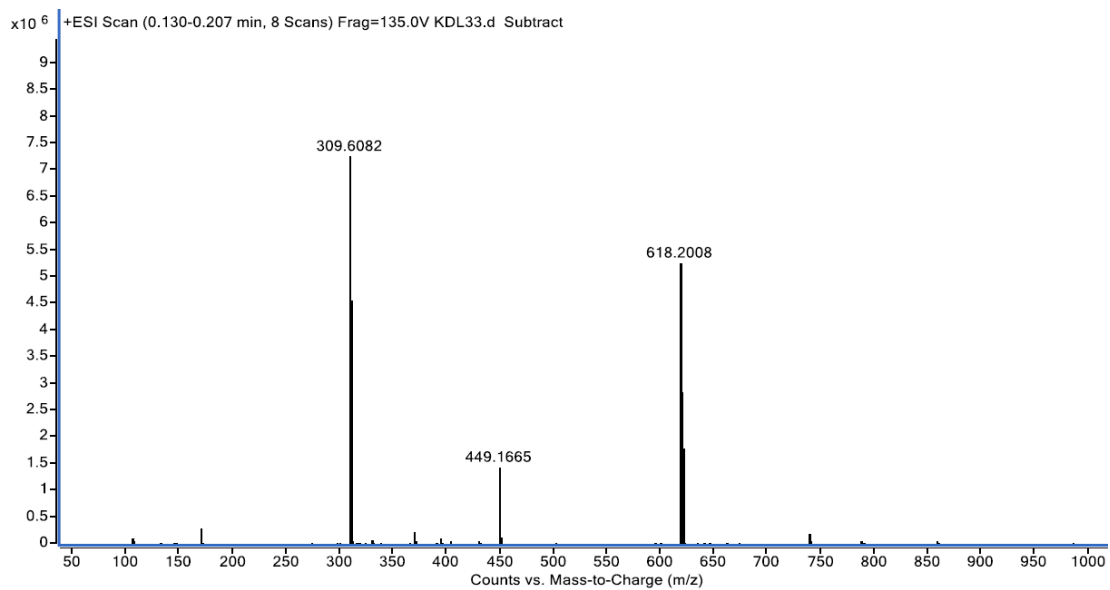

## Compound 14

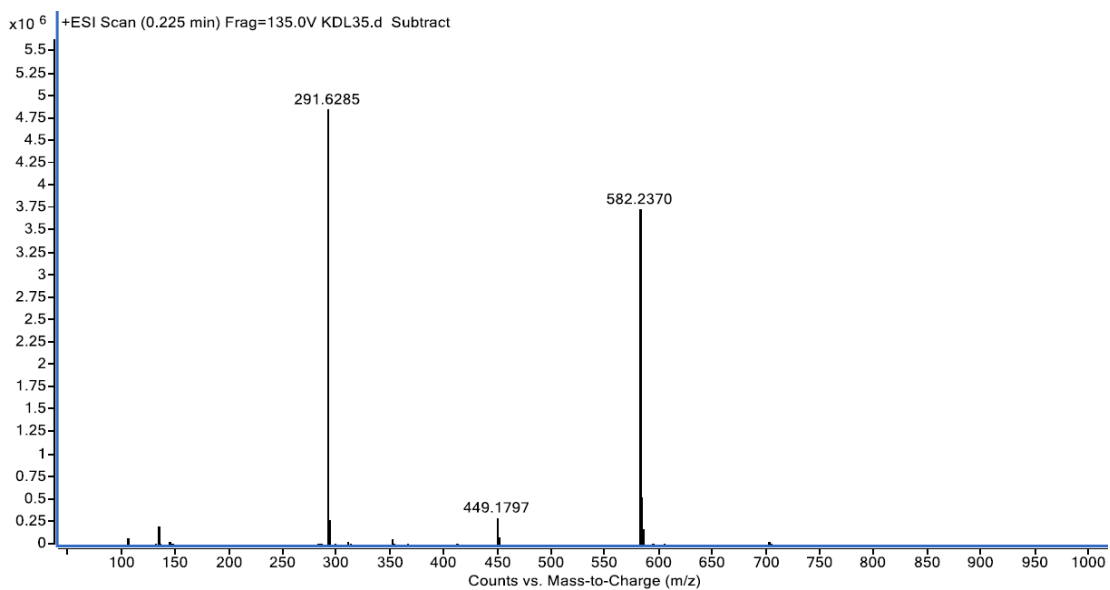

## Compound 15

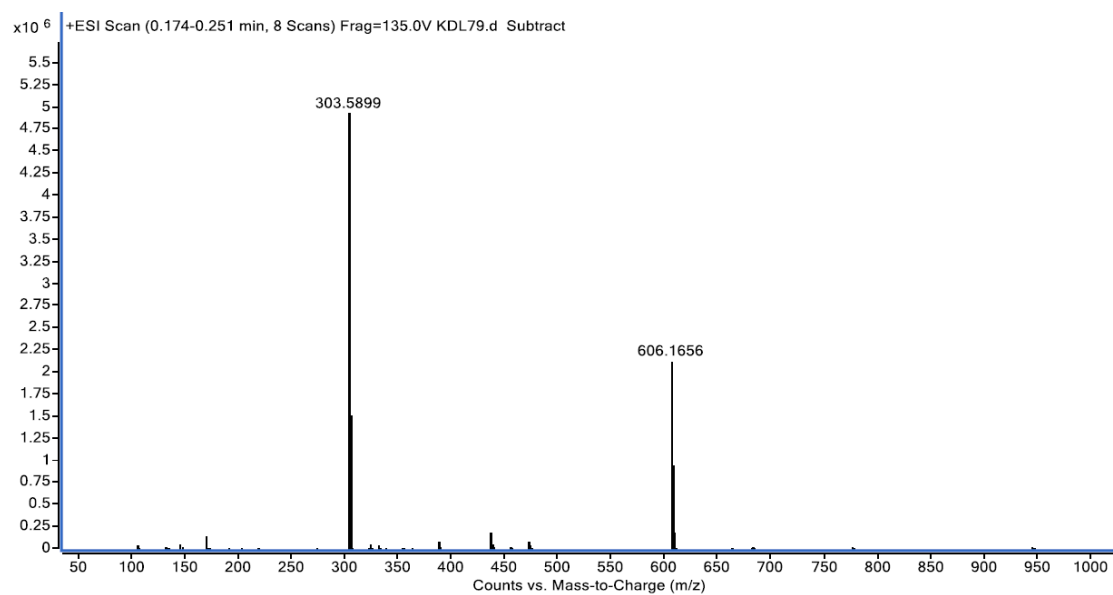

## Compound 16

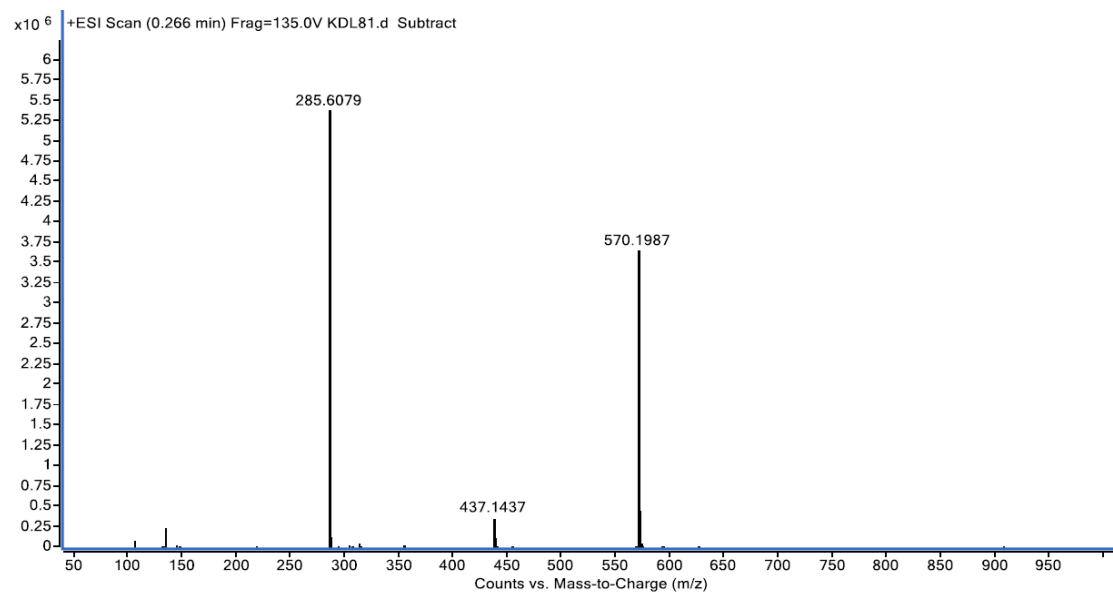

## Compound 17

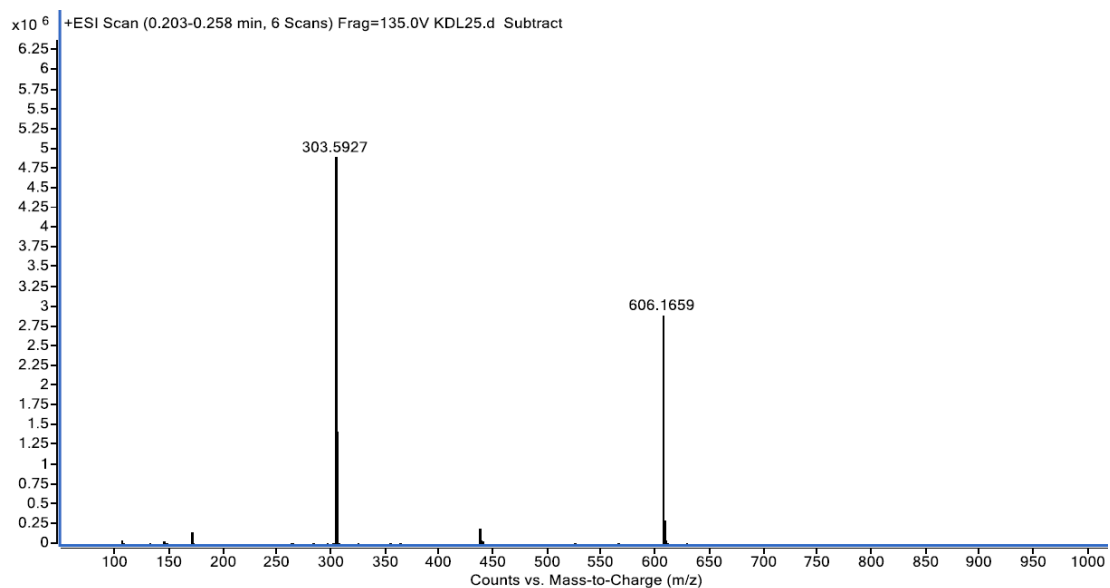

## Compound 18

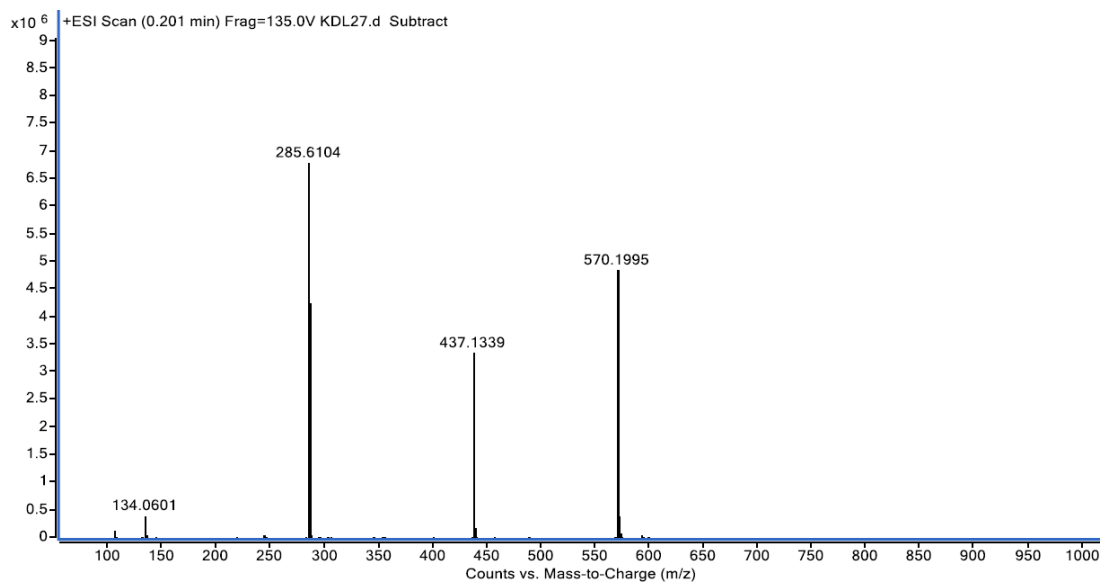

## Compound 19

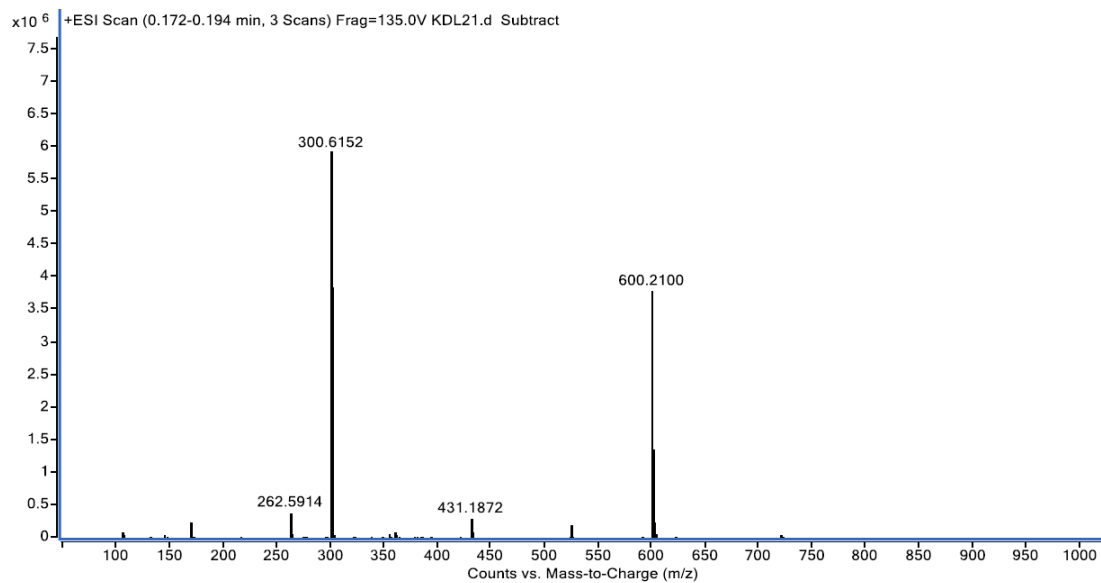

## Compound 20

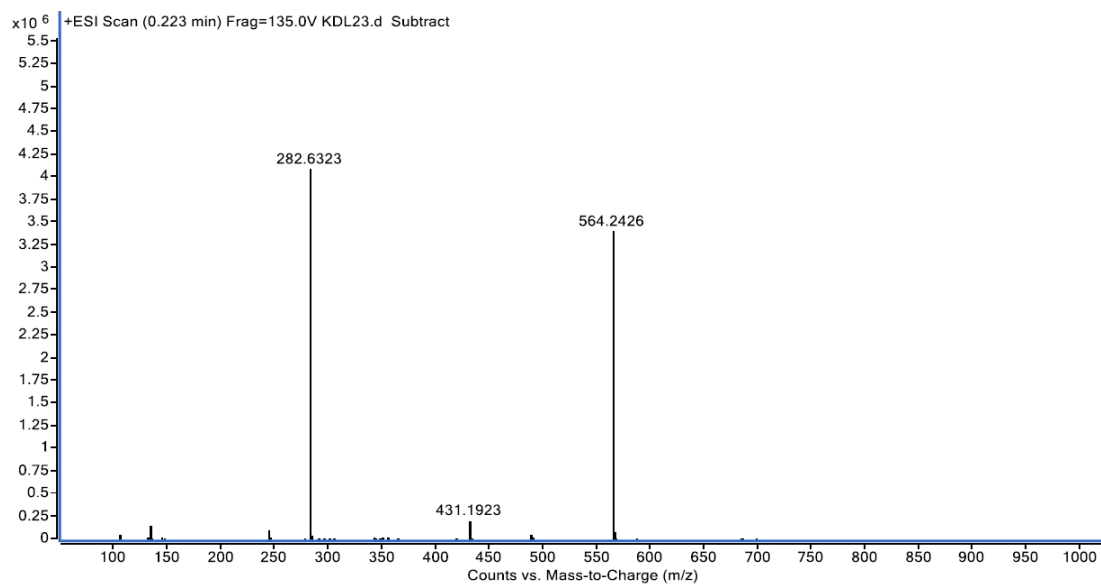



## Compound 21

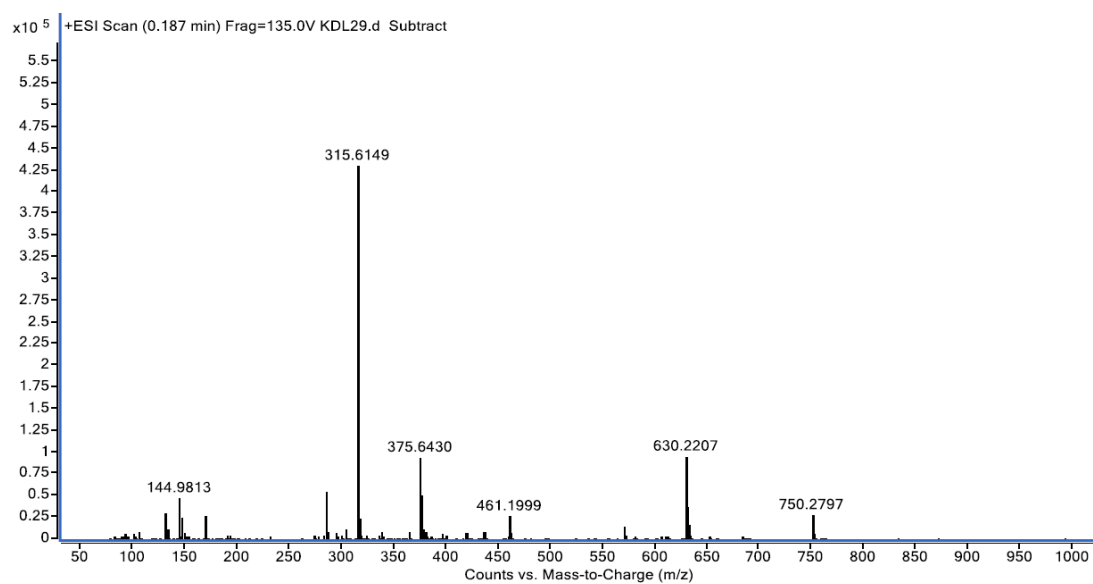

## Compound 22

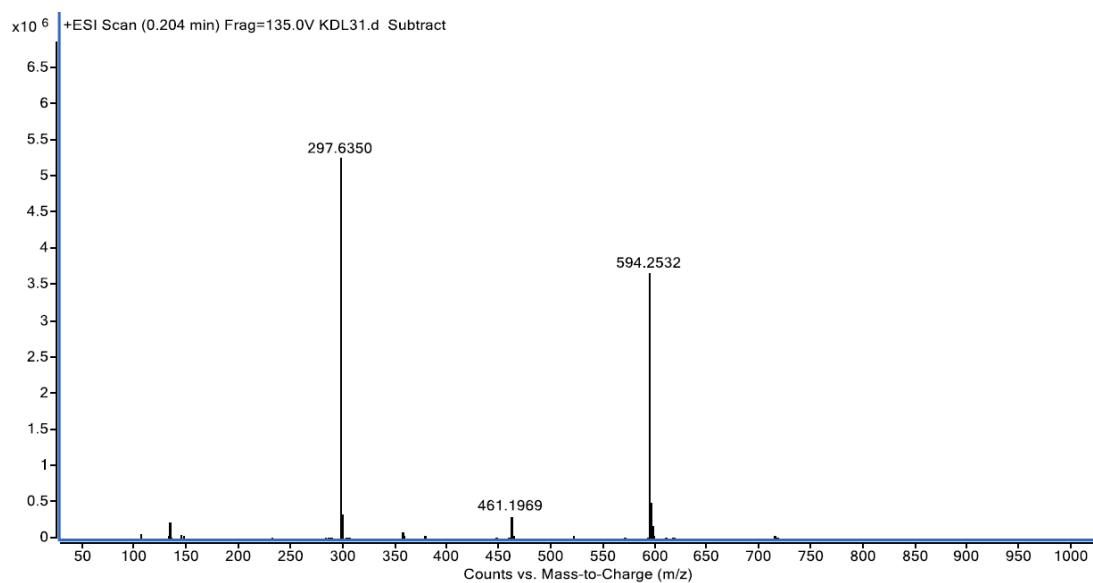

## Compound 23

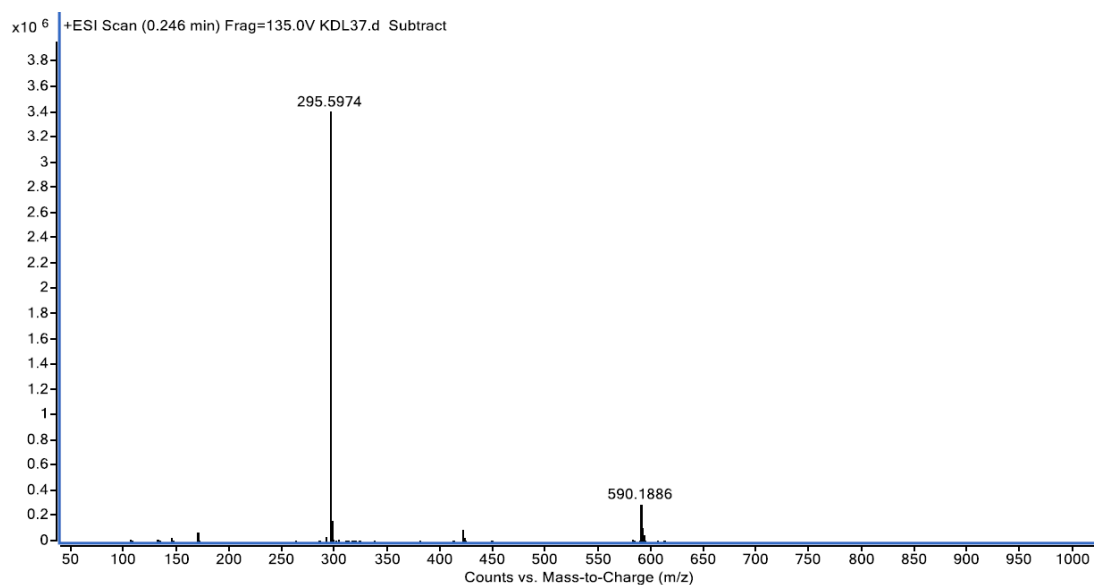

## Compound 24

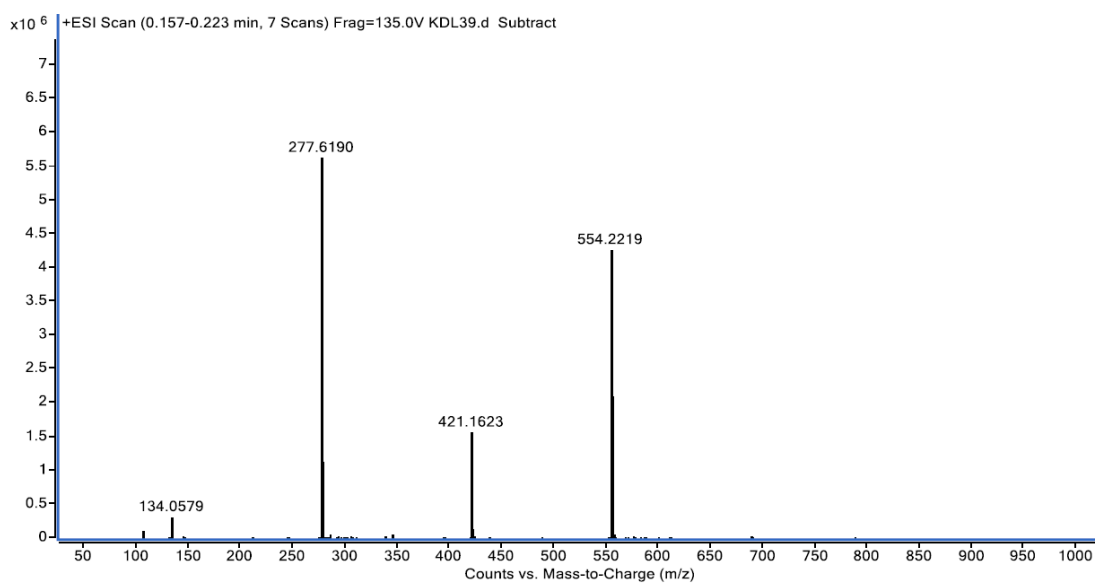

## Compound 25

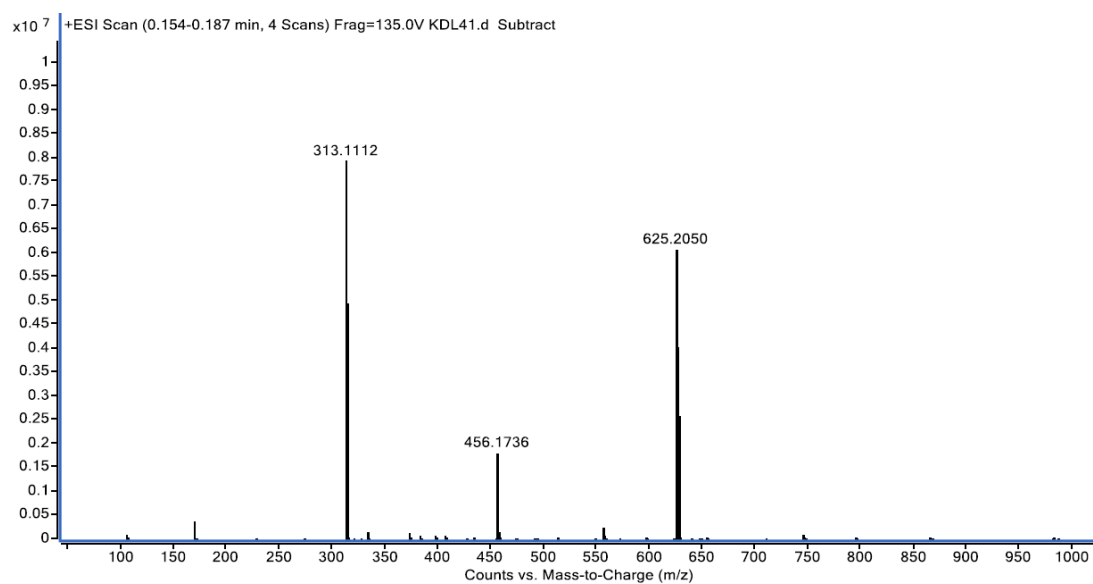

## Compound 26

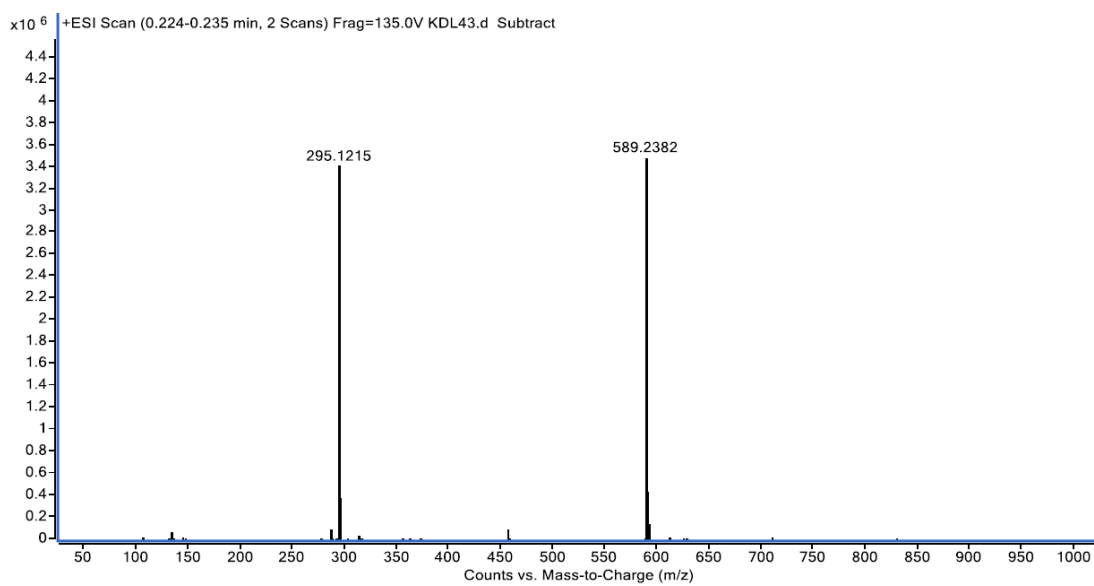

## Compound 27

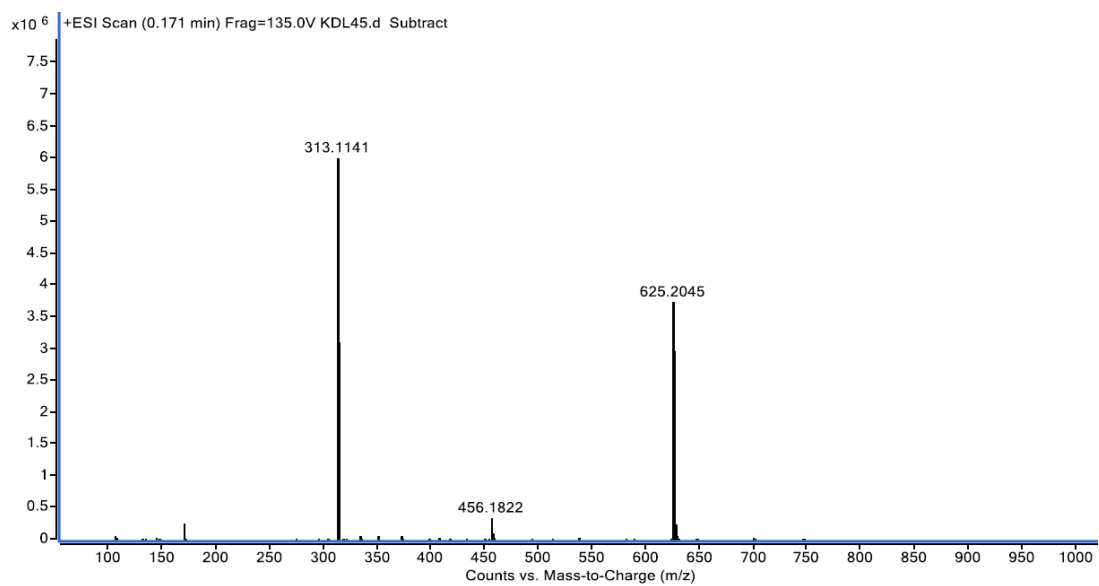

## Compound 28

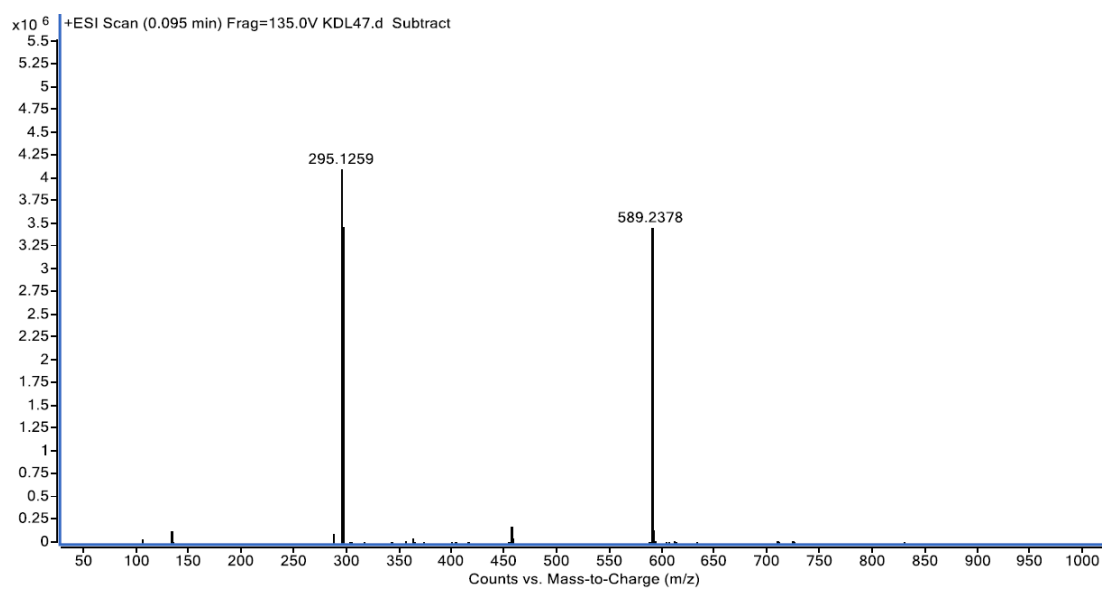

## Compound 29

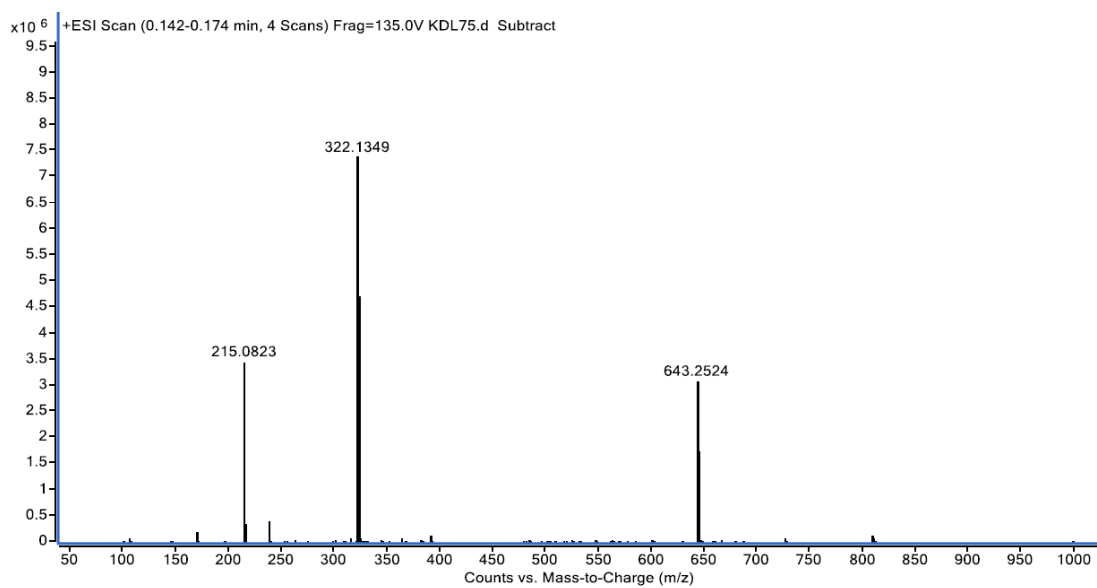

## Compound 30

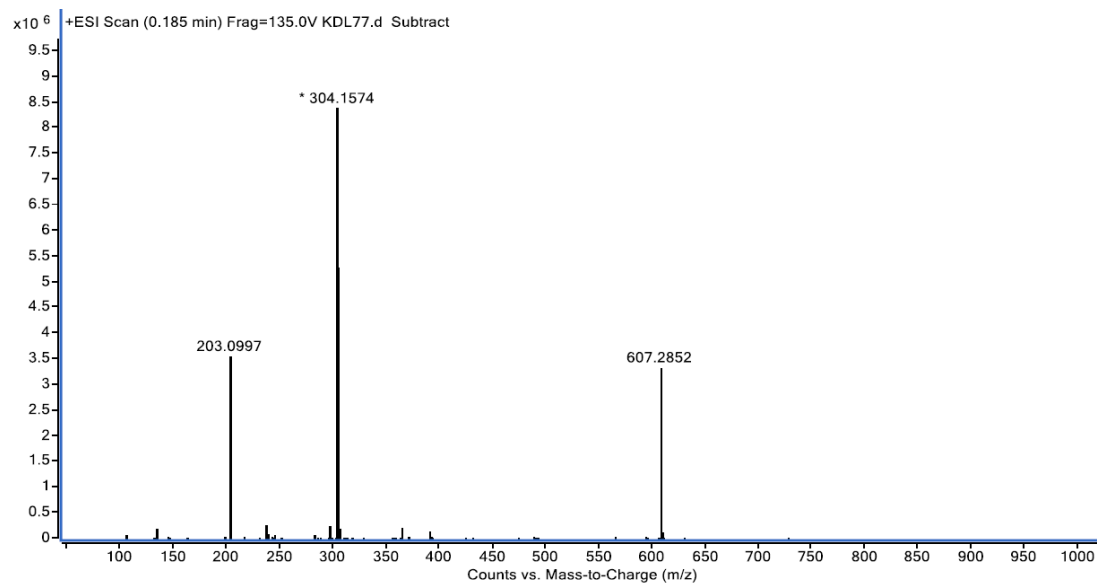

## Compound 31

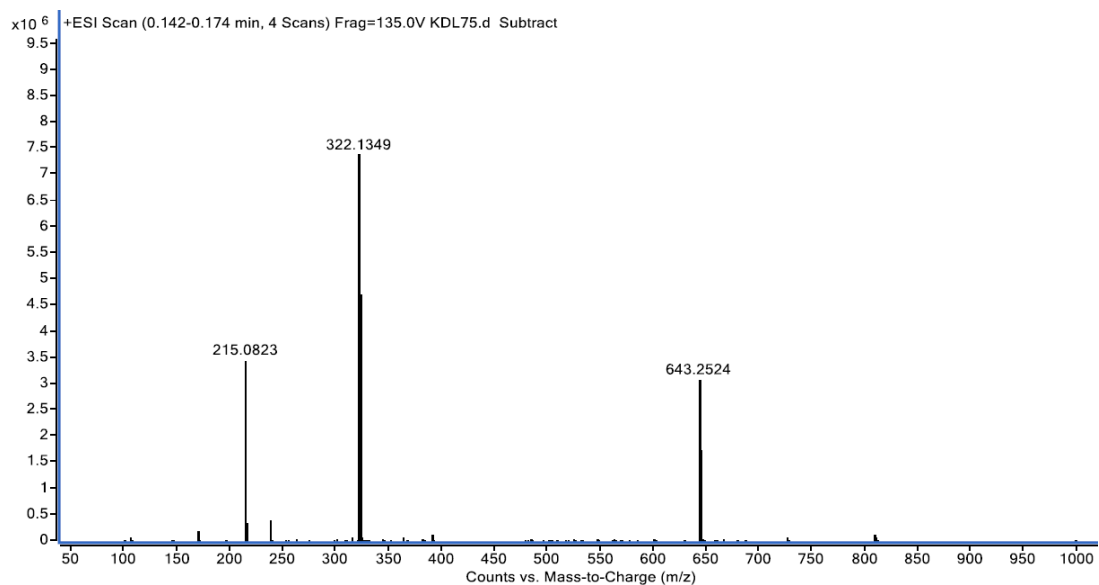

## Compound 32

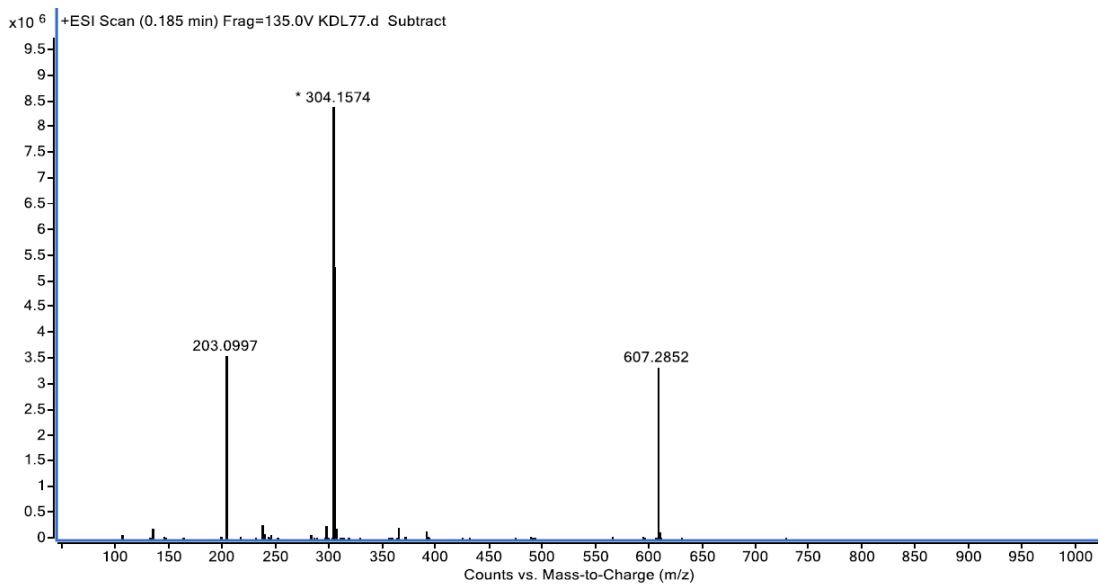

### 3. NMR spectrum

#### 8a <sup>1</sup>H NMR

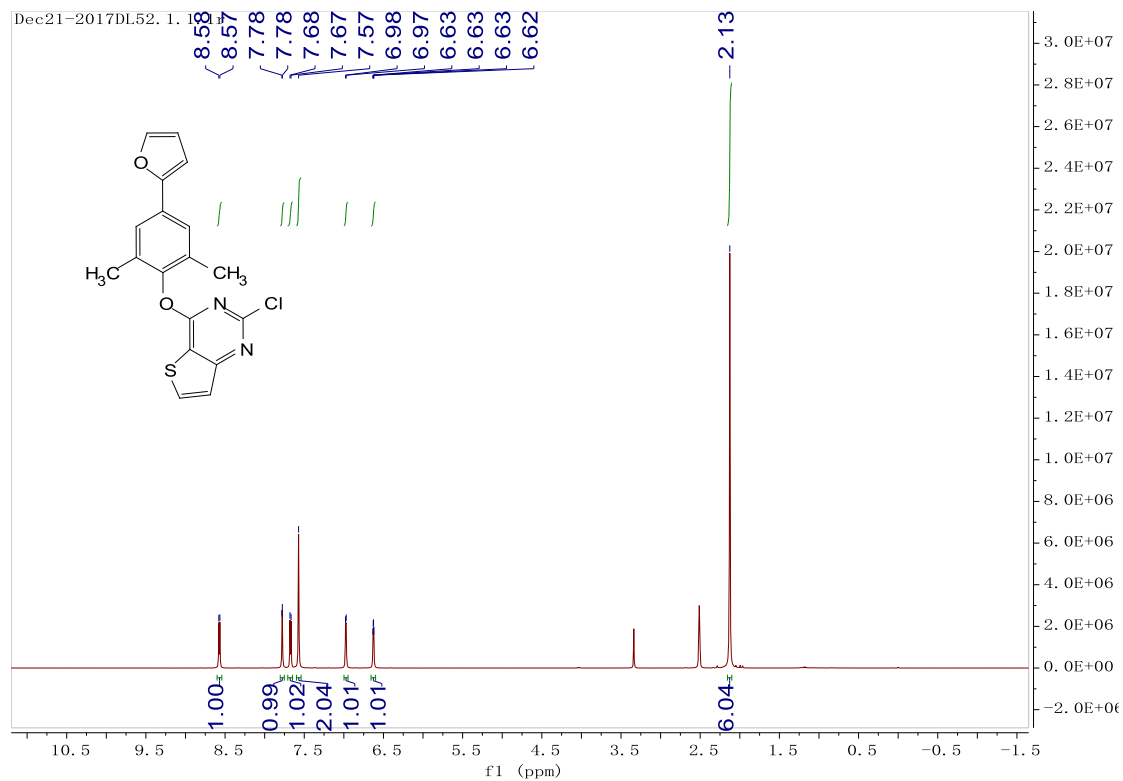

#### 8a <sup>13</sup>C NMR

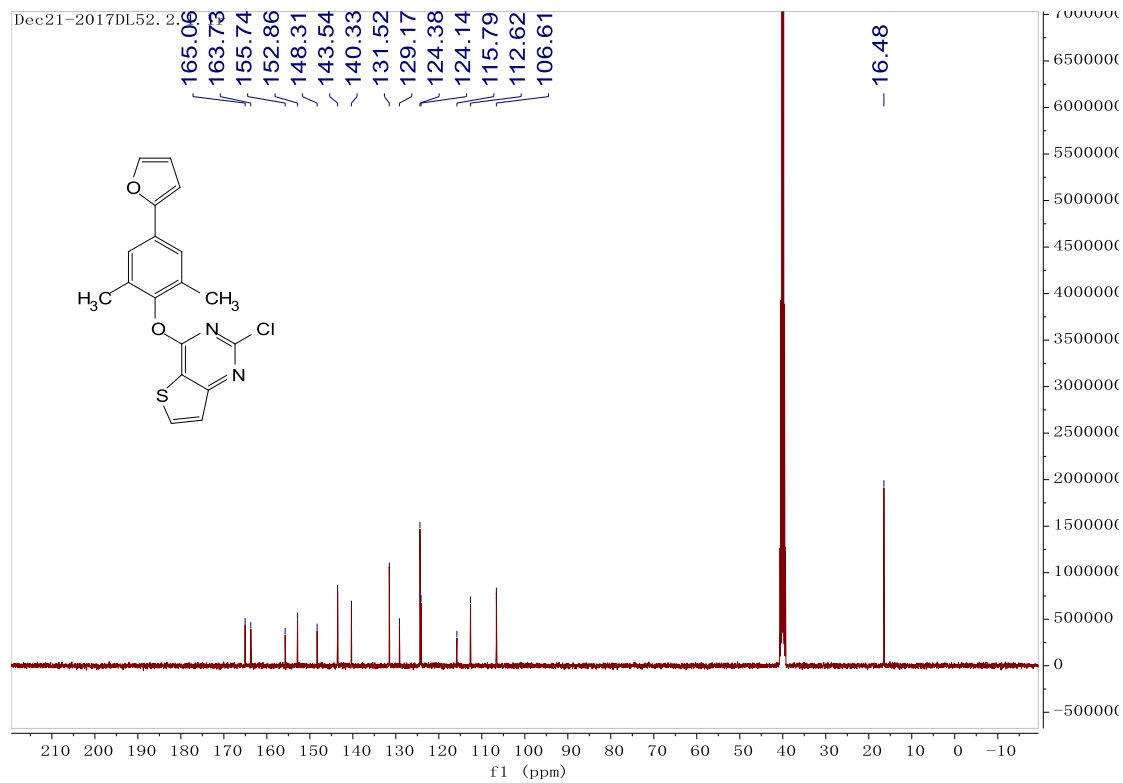

### 8b <sup>1</sup>H NMR

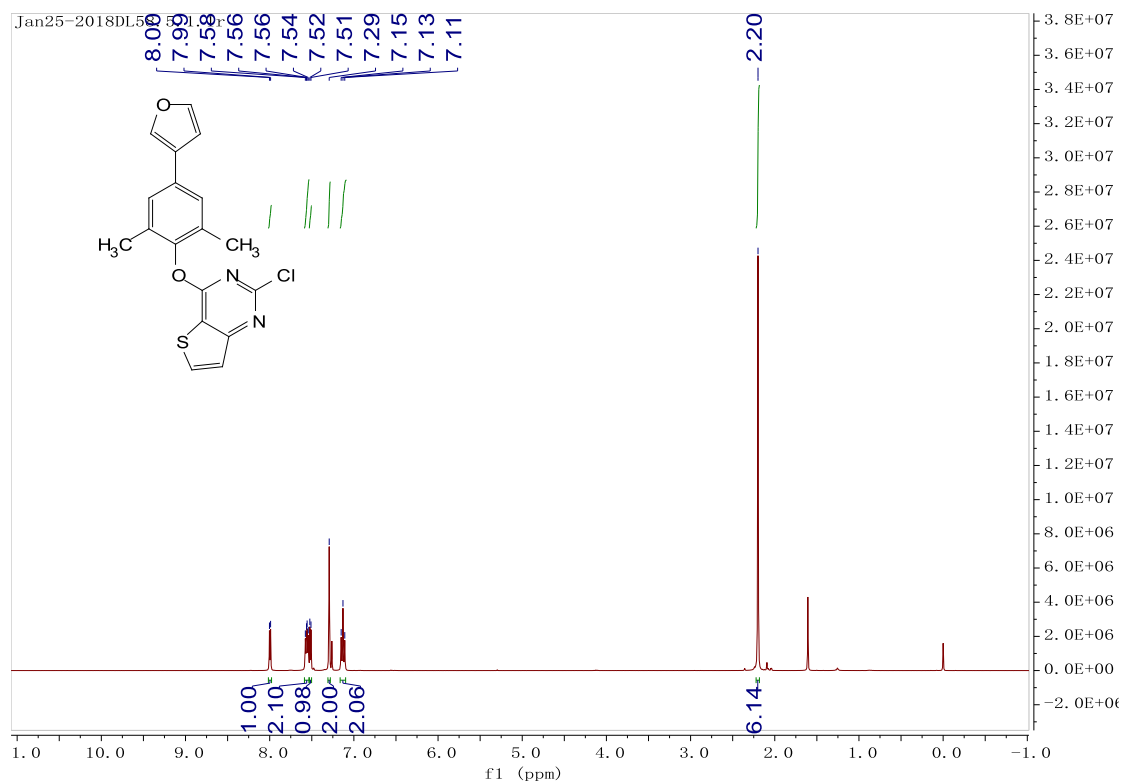

### 8b <sup>13</sup>C NMR

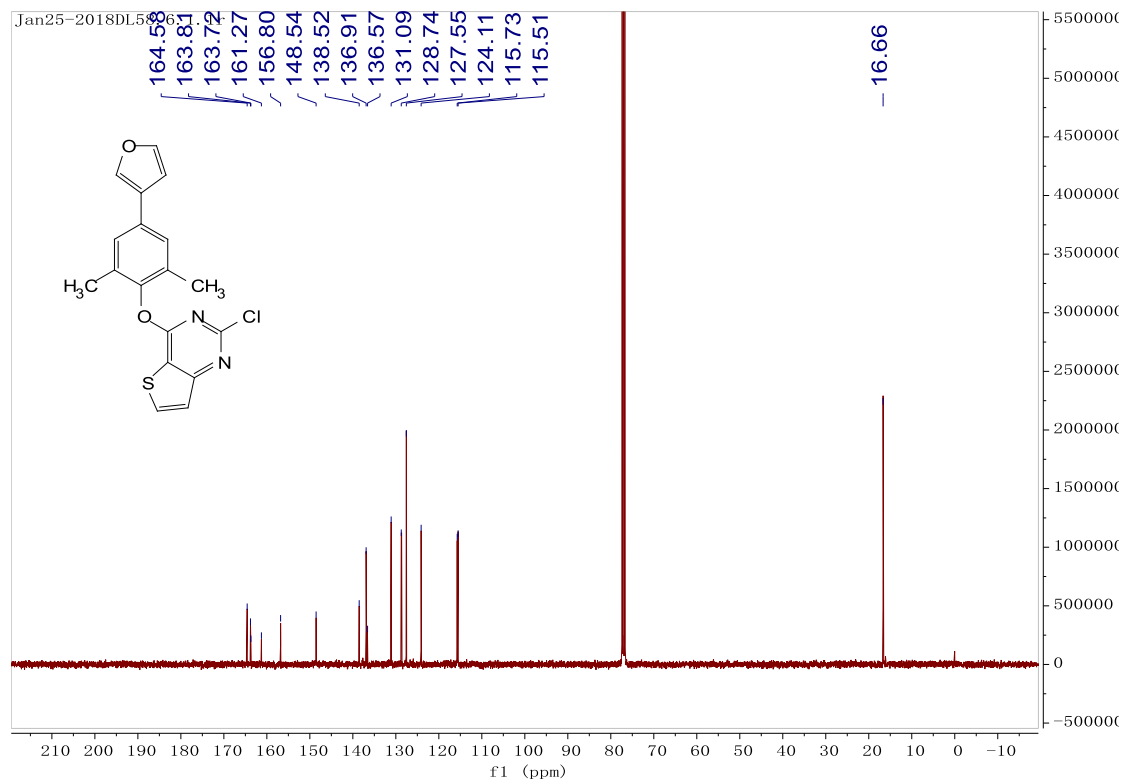



### 8c <sup>1</sup>H NMR

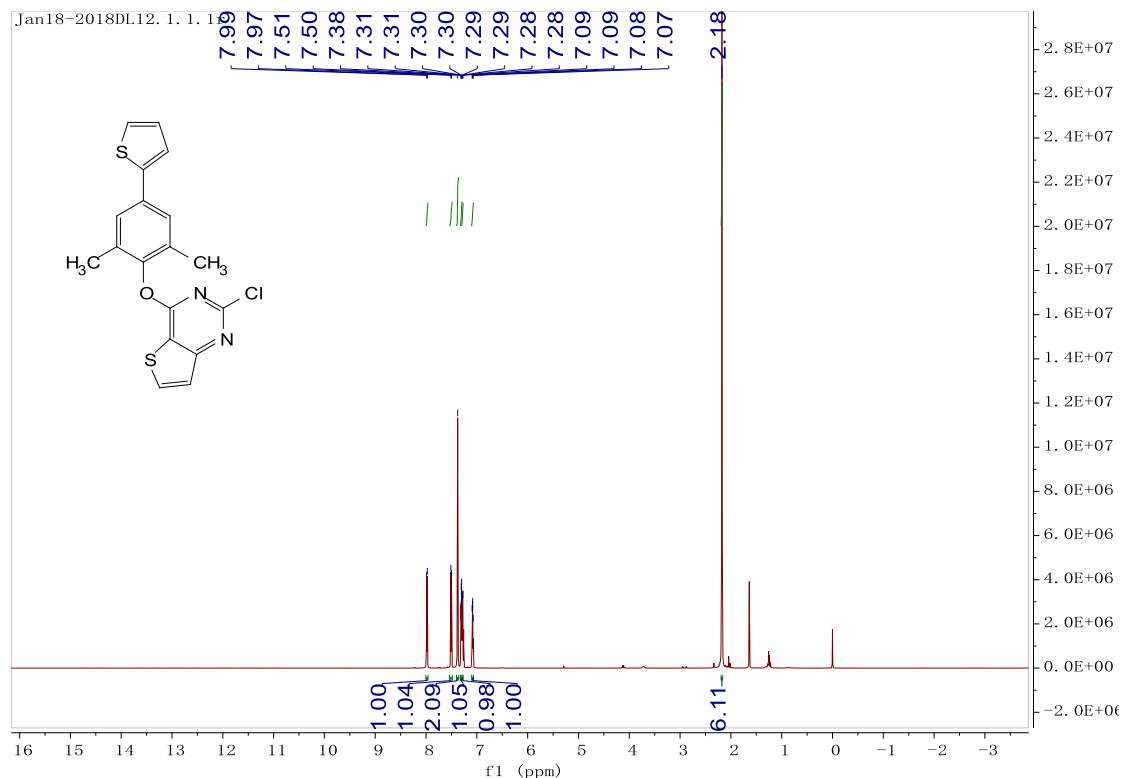

### 8c <sup>13</sup>C NMR

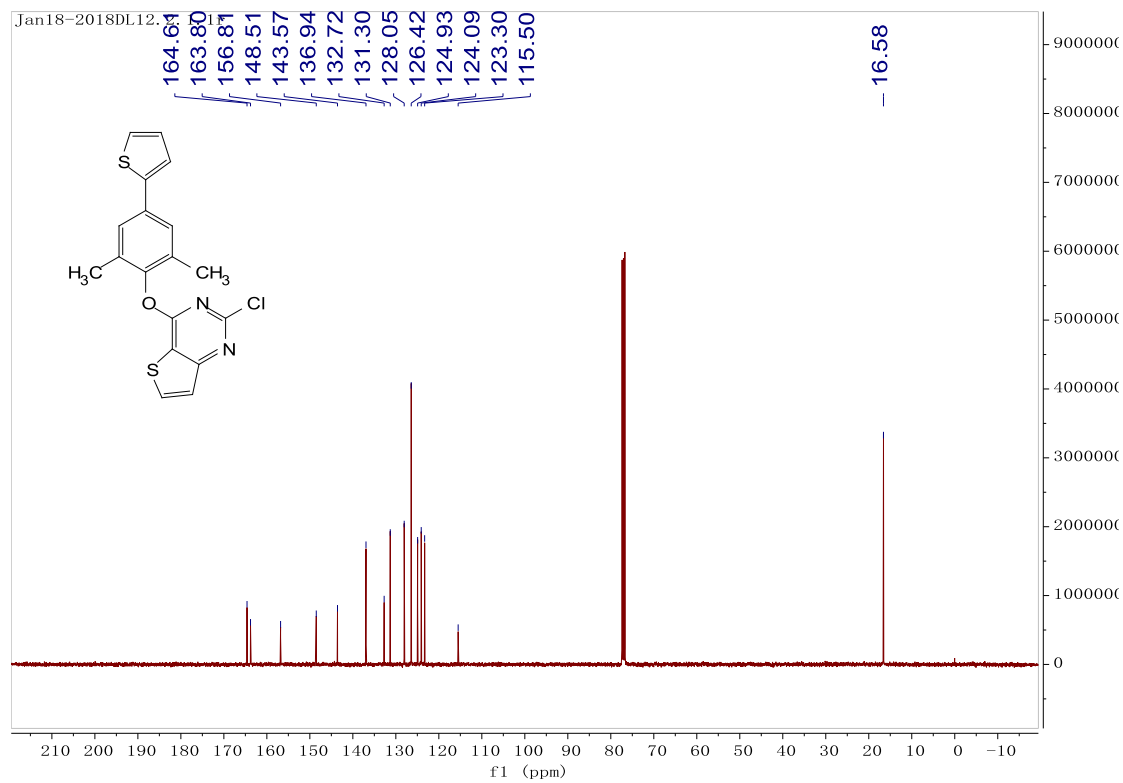

### 8d <sup>1</sup>H NMR

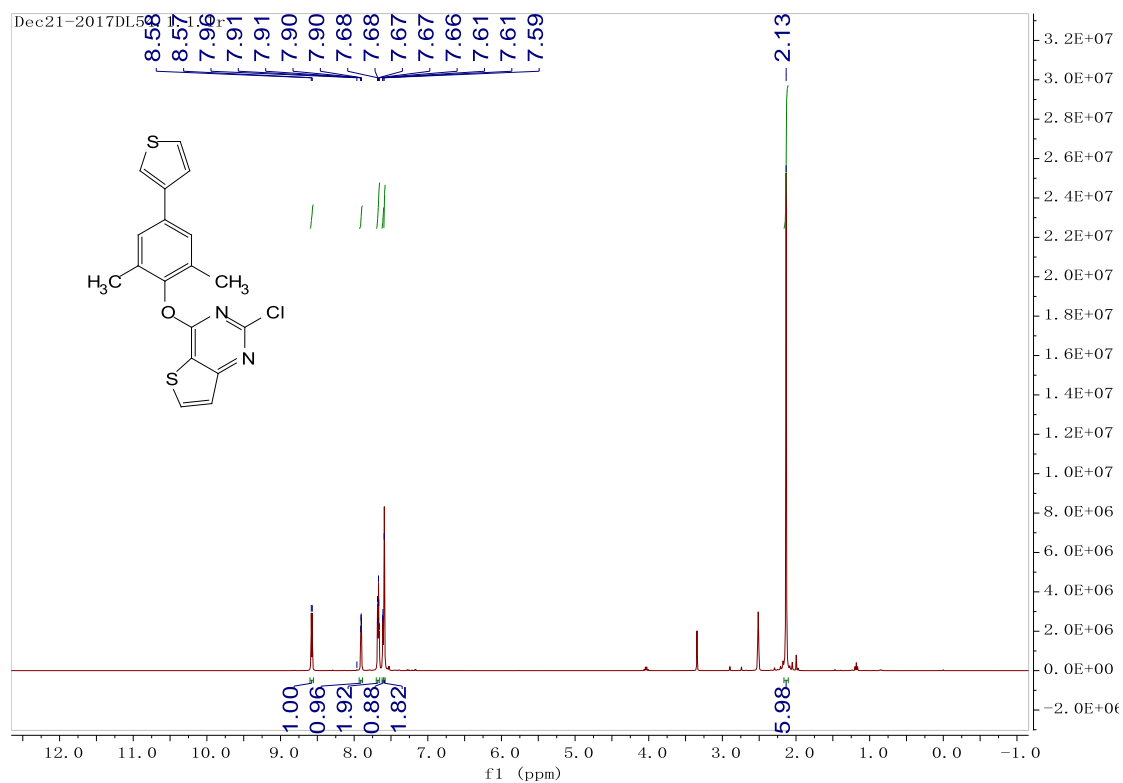

### 8d <sup>13</sup>C NMR

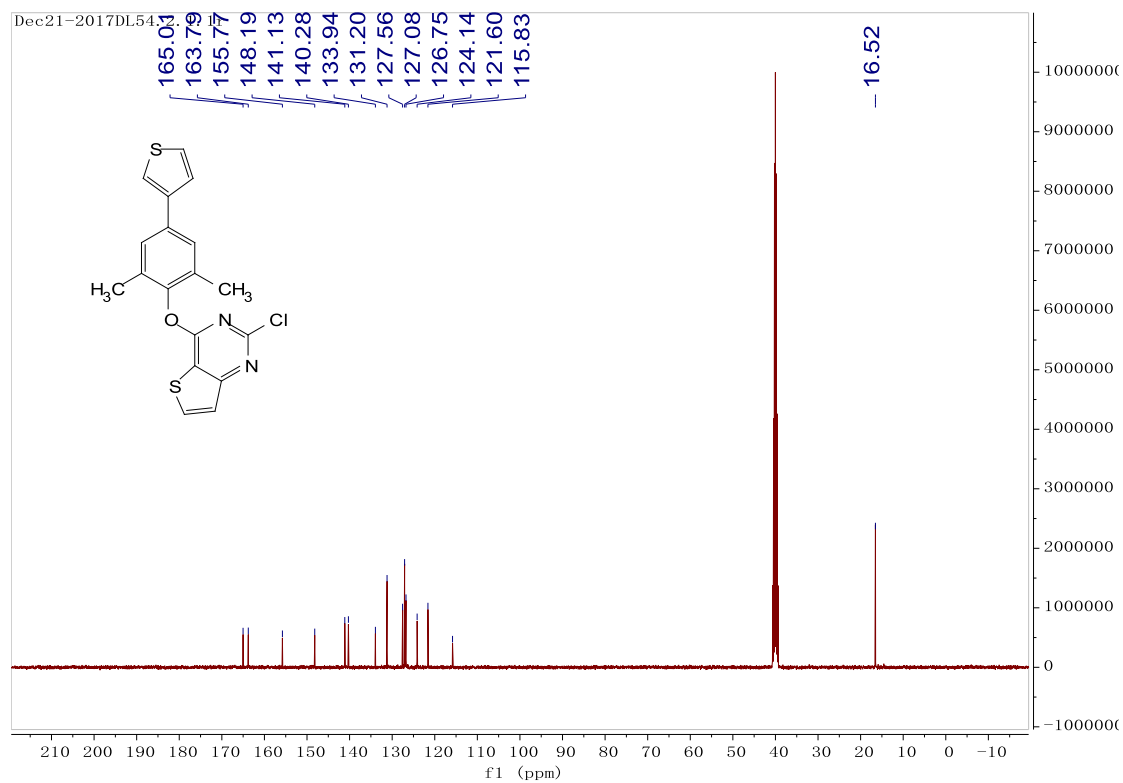

### 8f <sup>1</sup>H NMR

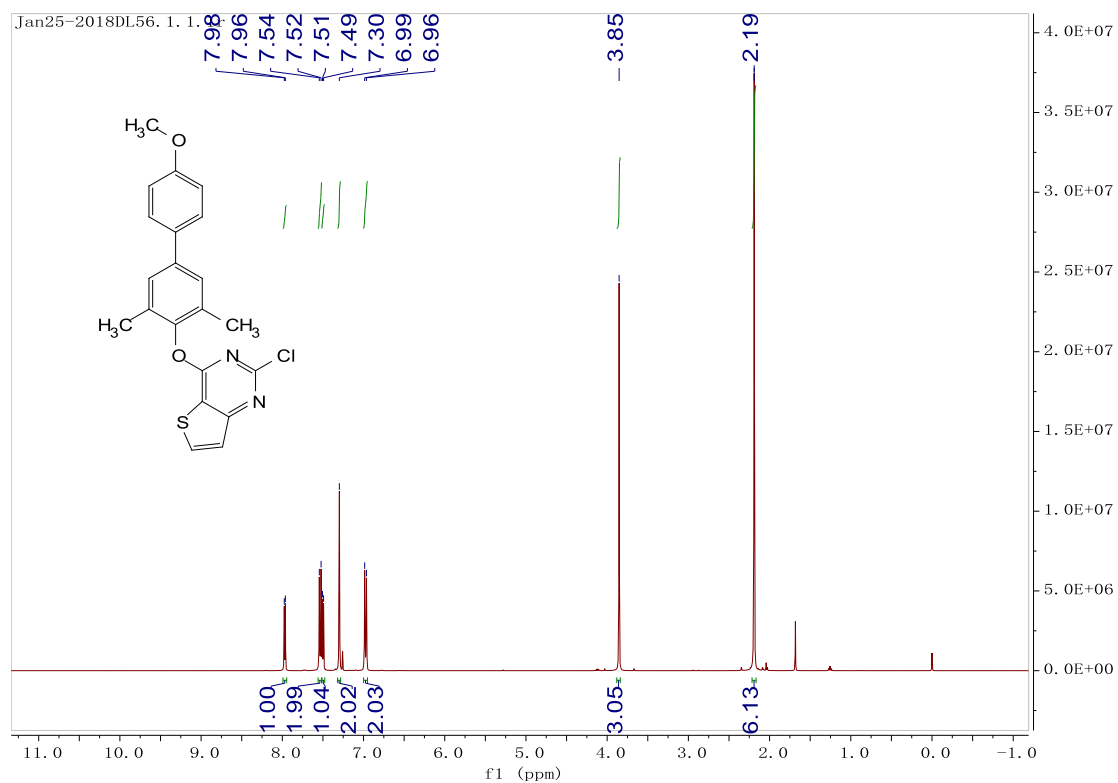

### 8f <sup>13</sup>C NMR

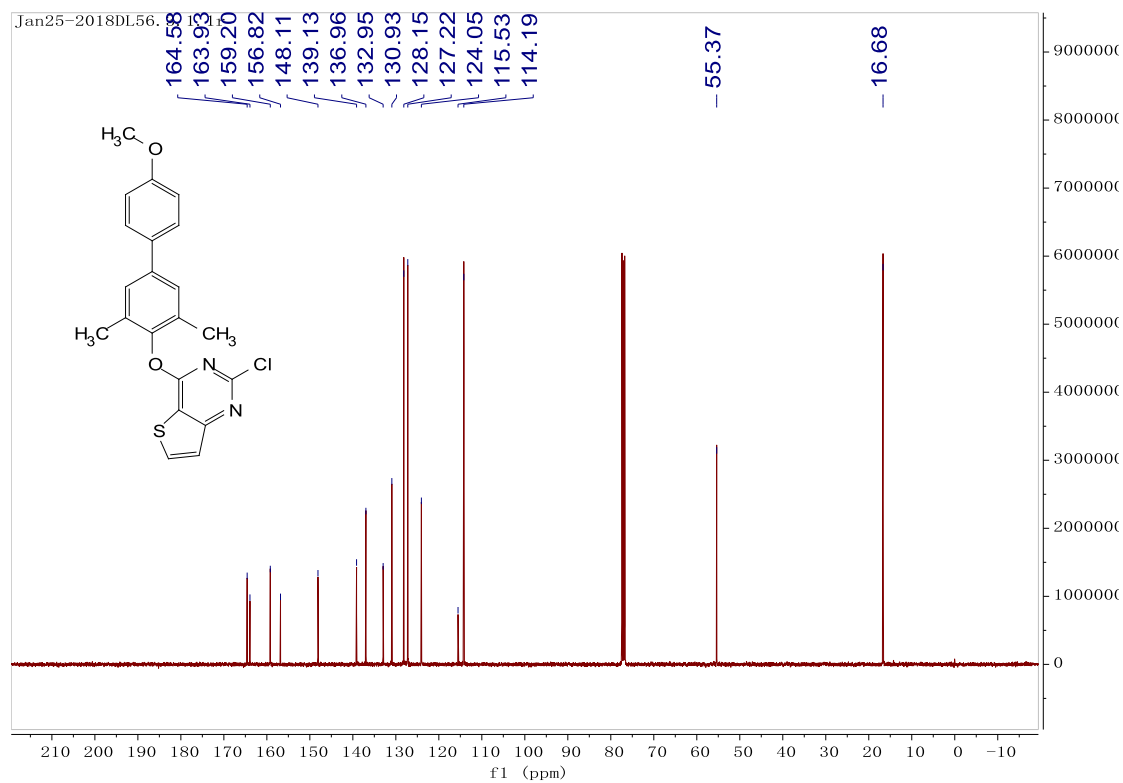

# 8g <sup>1</sup>H NMR

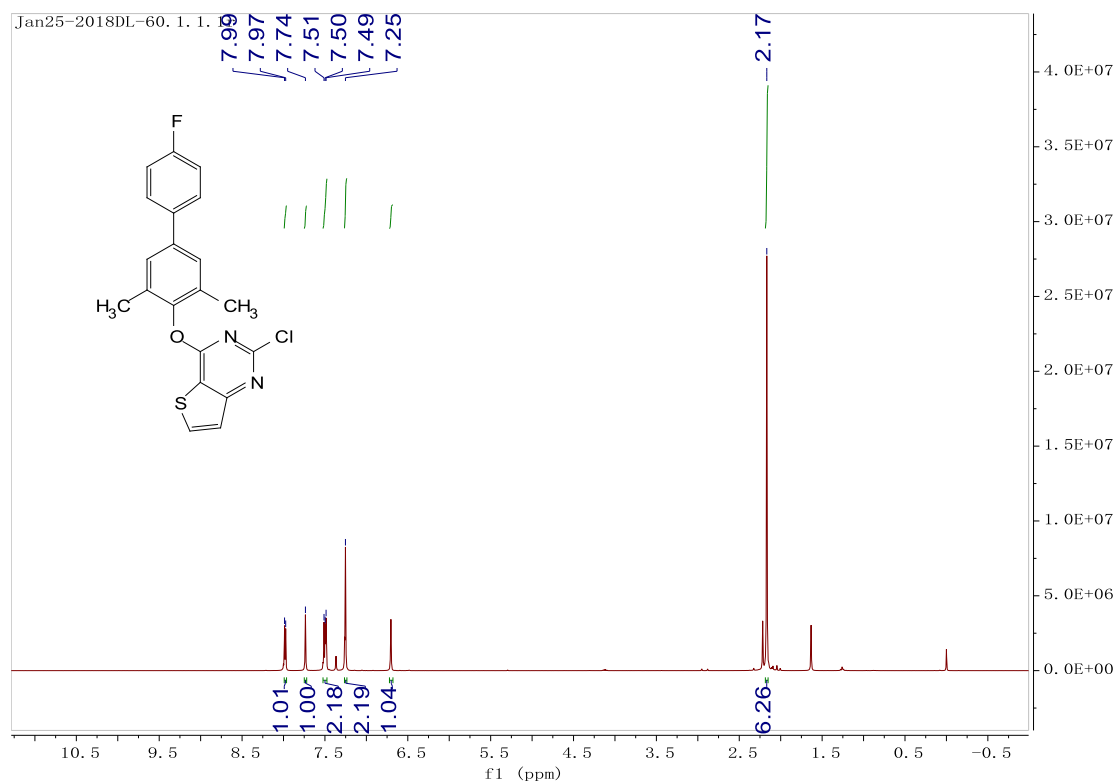

# 8g <sup>13</sup>C NMR

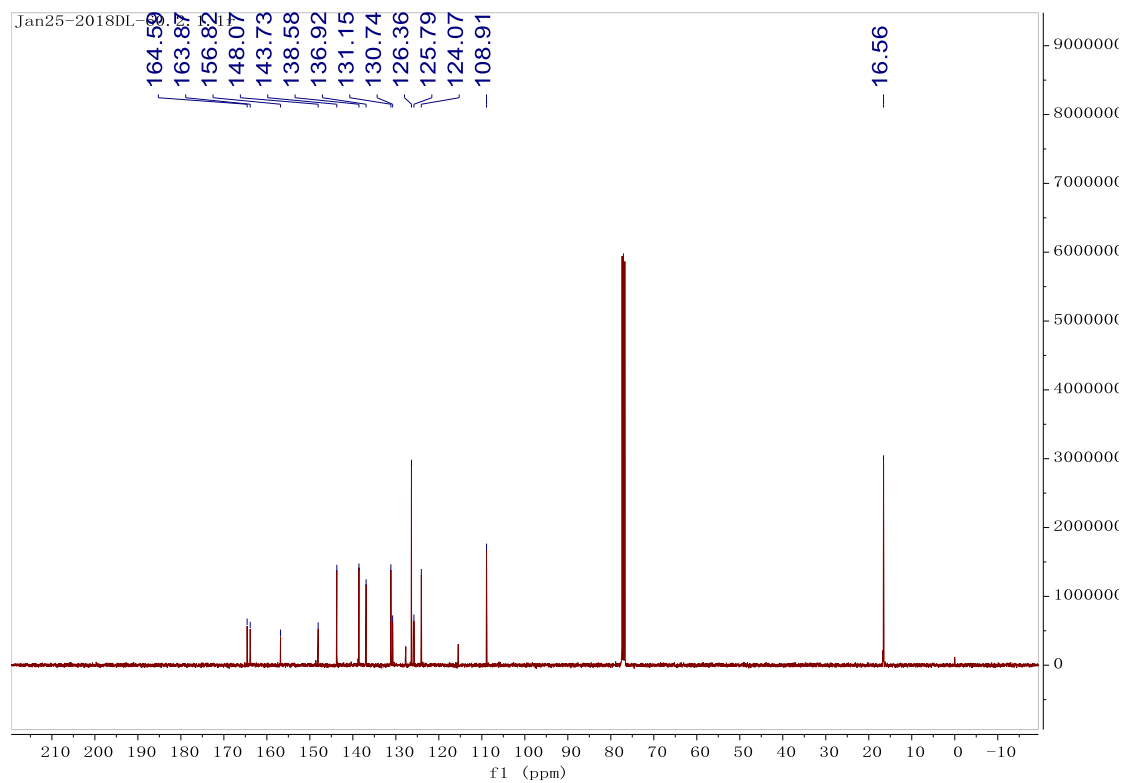

### 8h <sup>1</sup>H NMR

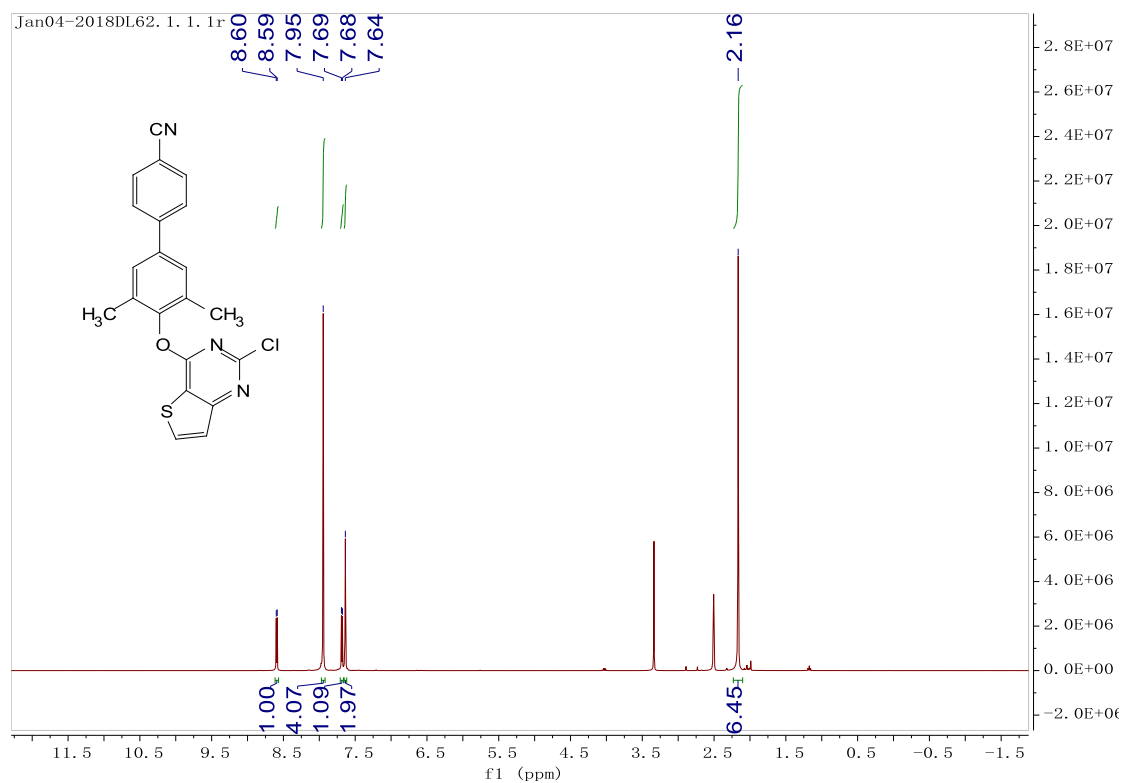

### 8h <sup>13</sup>C NMR

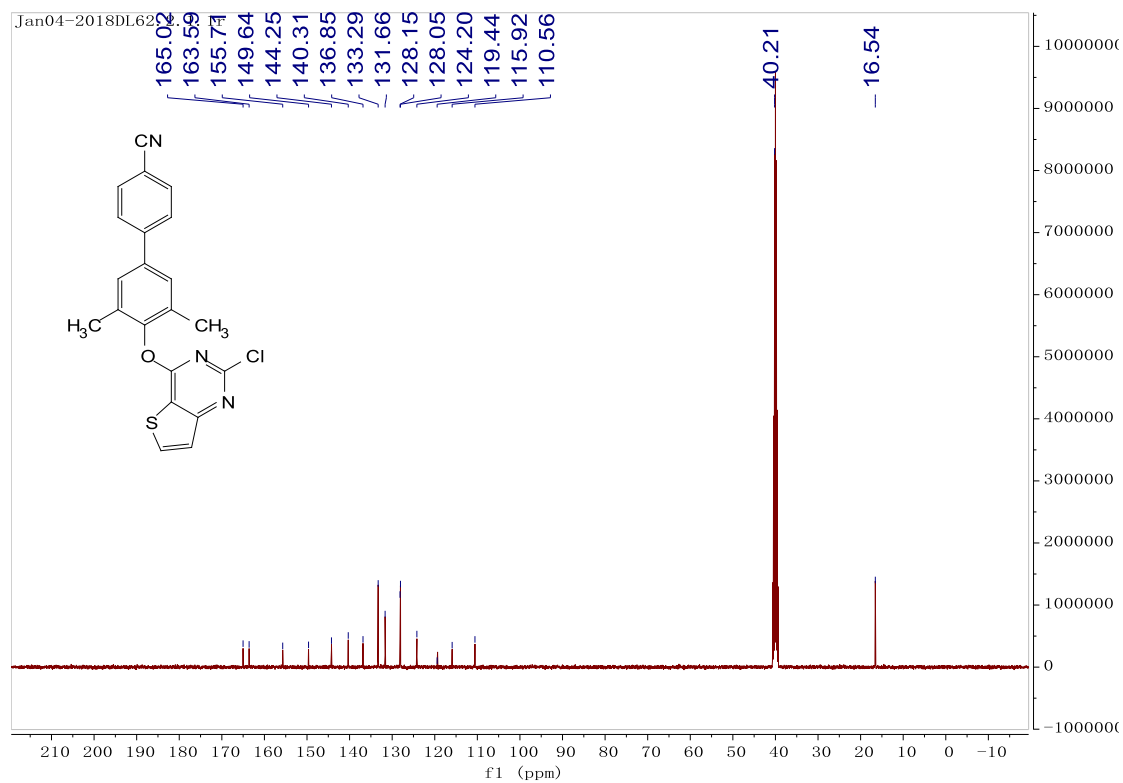

### 8i <sup>1</sup>H NMR

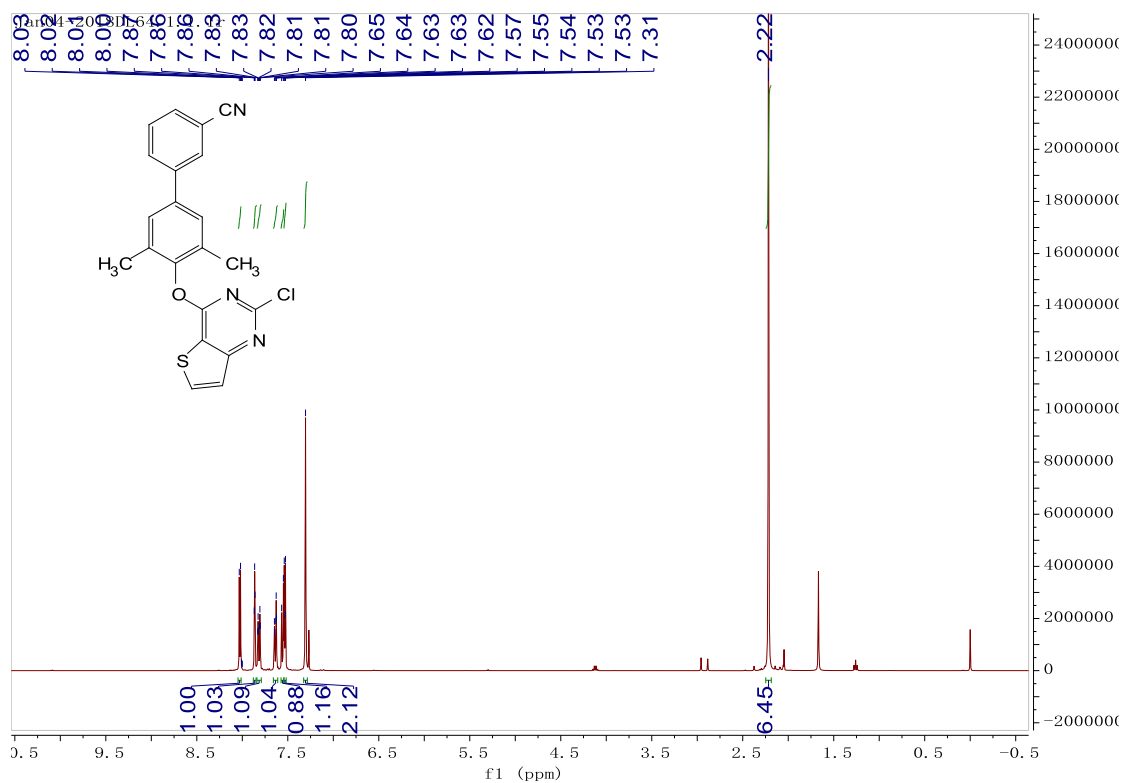

### 8i <sup>13</sup>C NMR

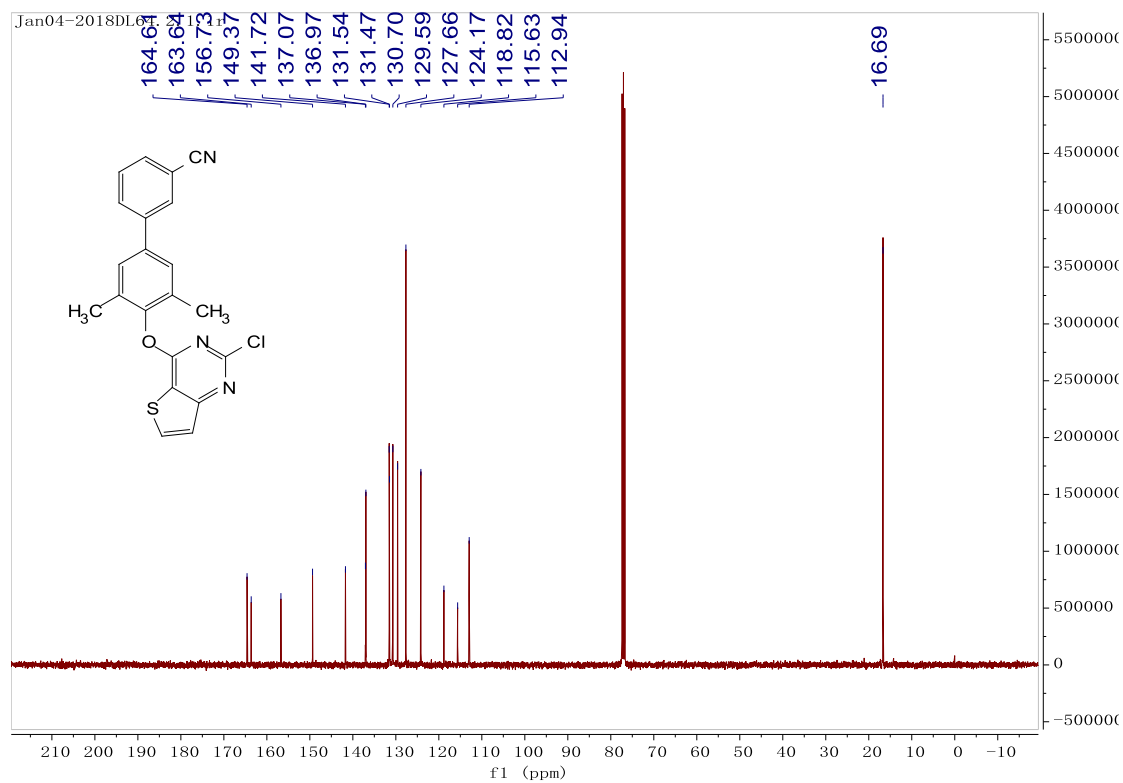

# 8j <sup>1</sup>H NMR

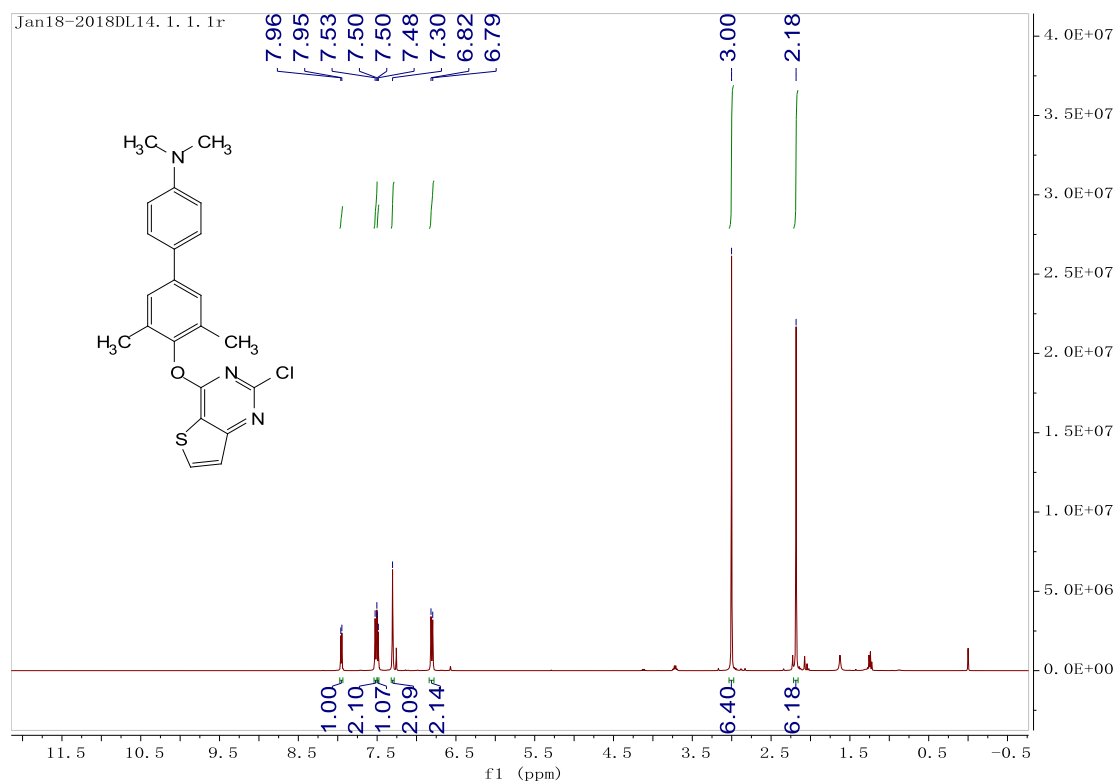

# 8j <sup>13</sup>C NMR

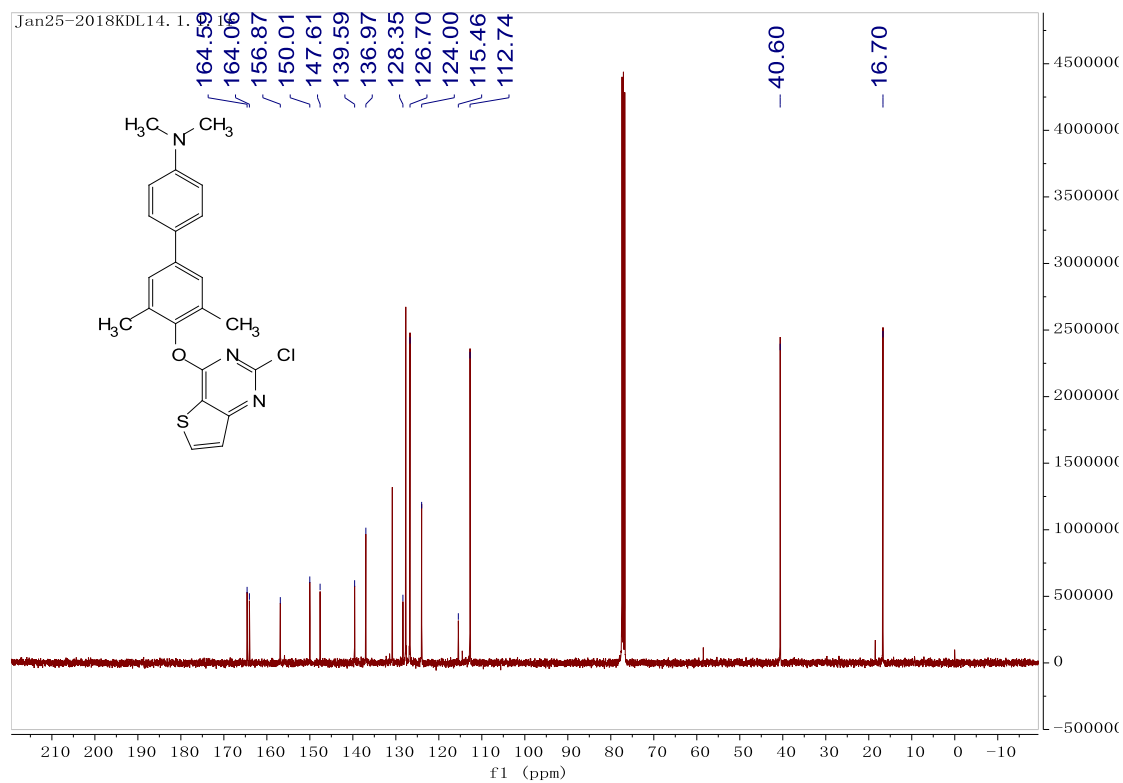

### 8k <sup>1</sup>H NMR

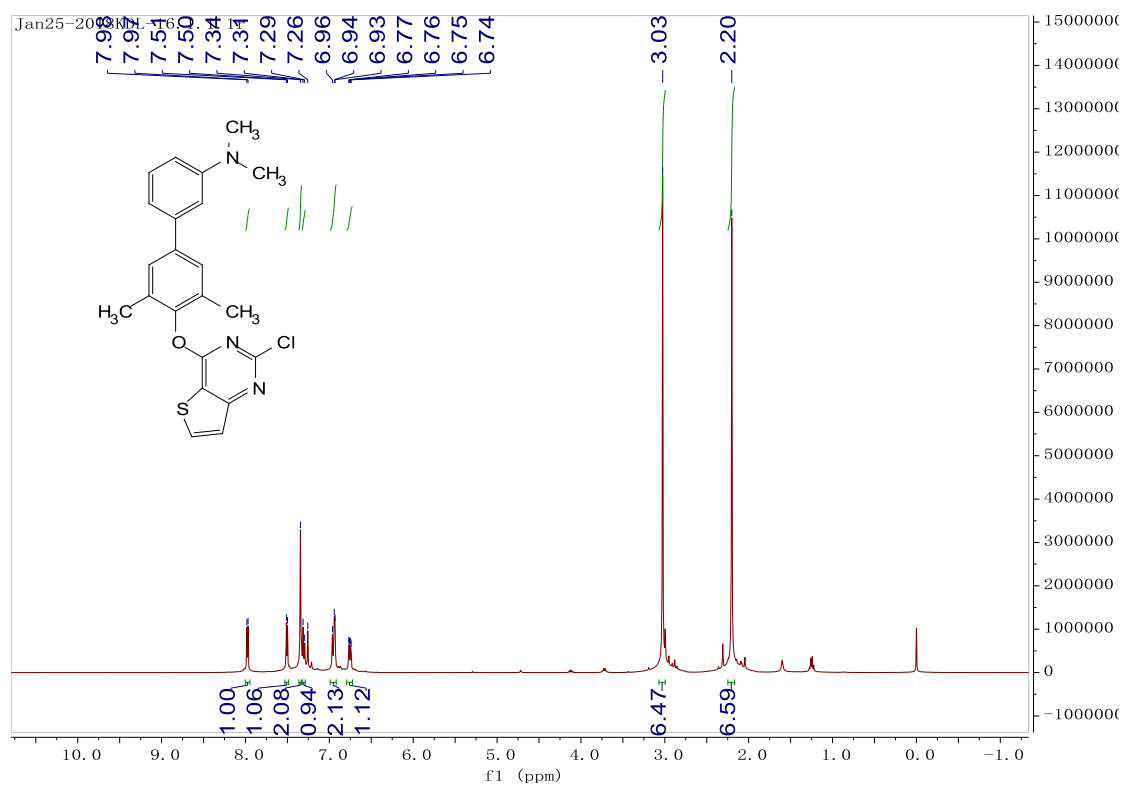

### 8k <sup>13</sup>C NMR

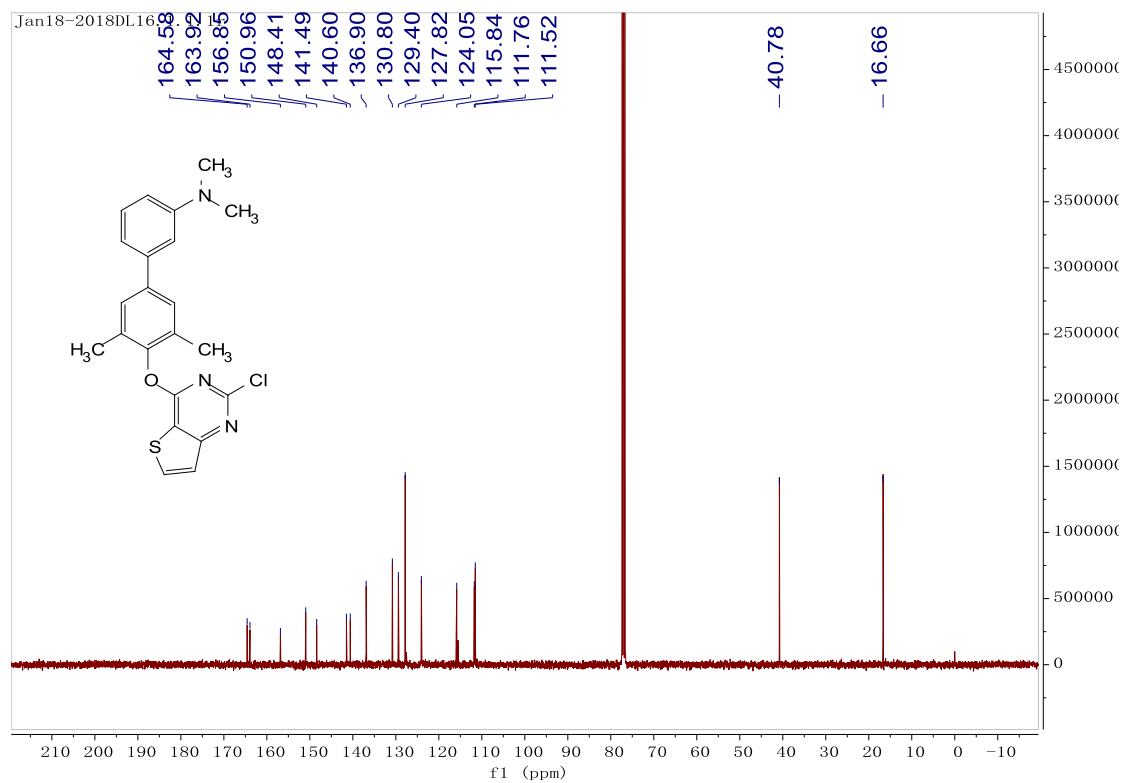



### 10a <sup>1</sup>H NMR

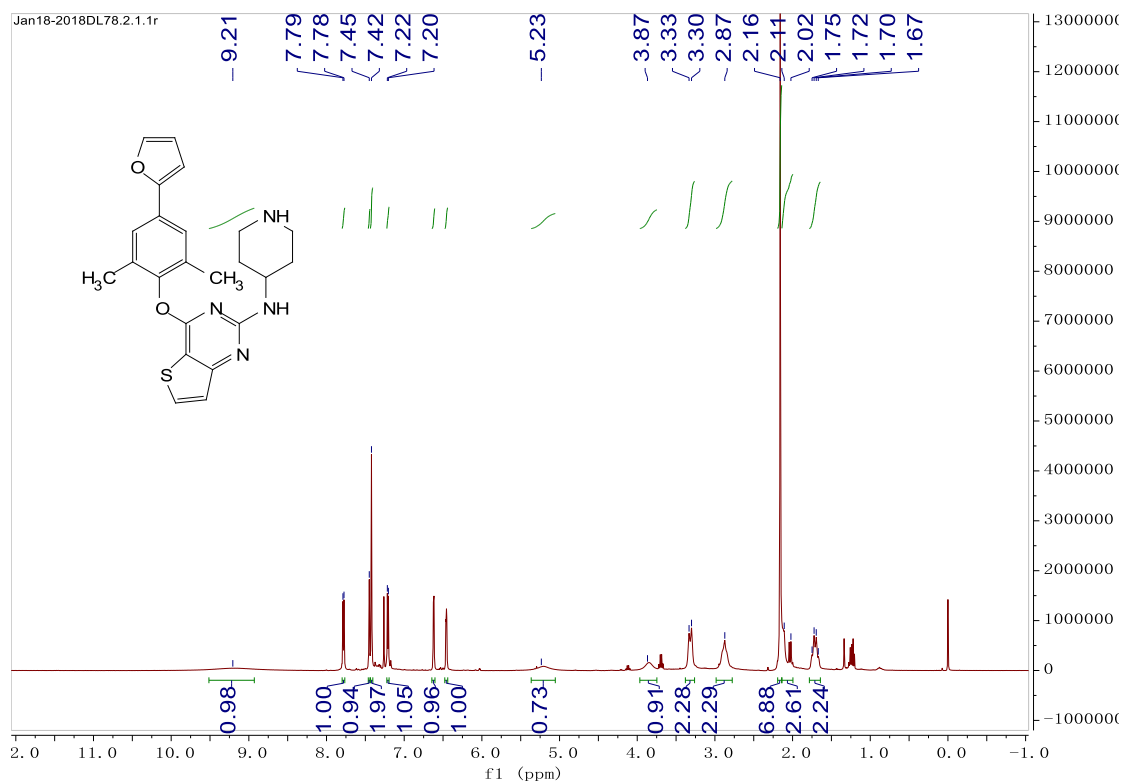

### 10a <sup>13</sup>C NMR

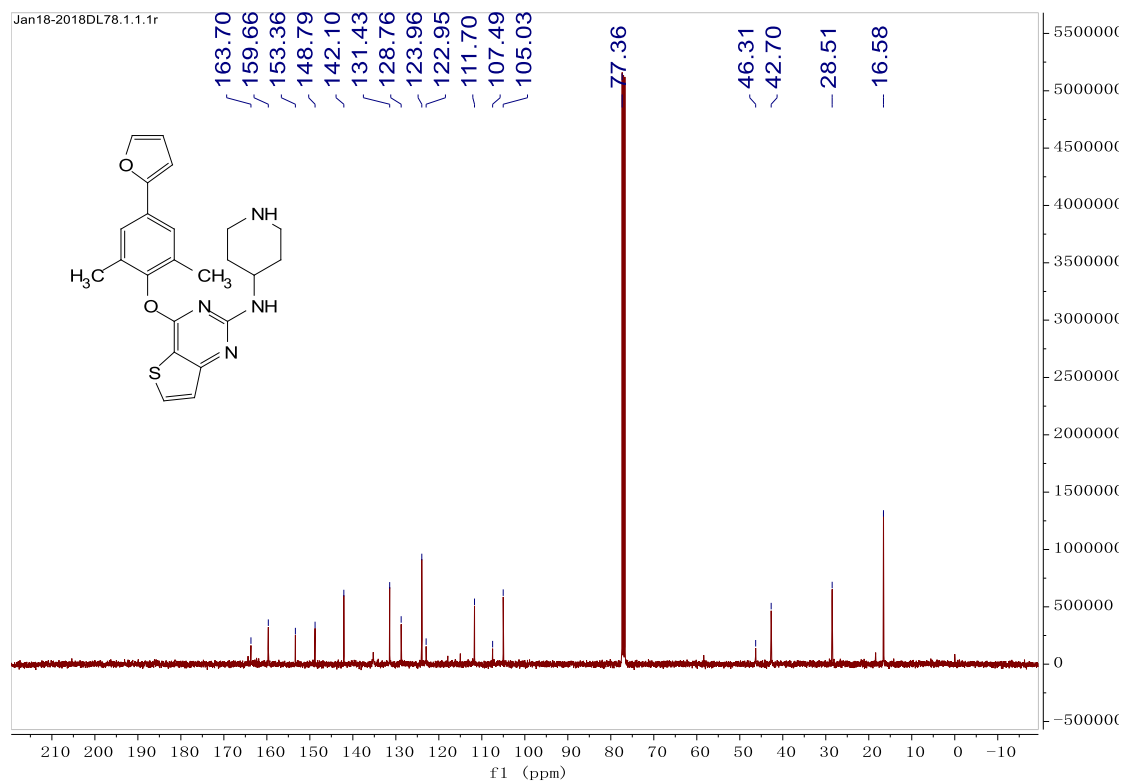

# 10e <sup>1</sup>H NMR

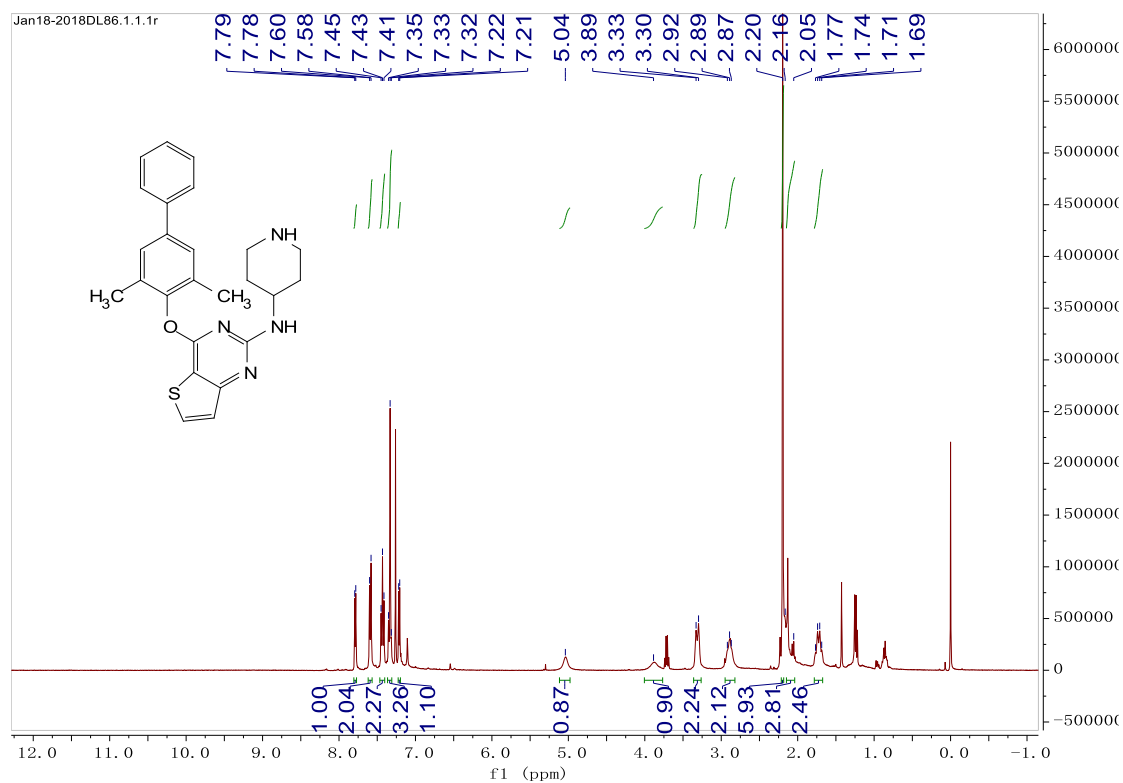

# 10e <sup>13</sup>C NMR

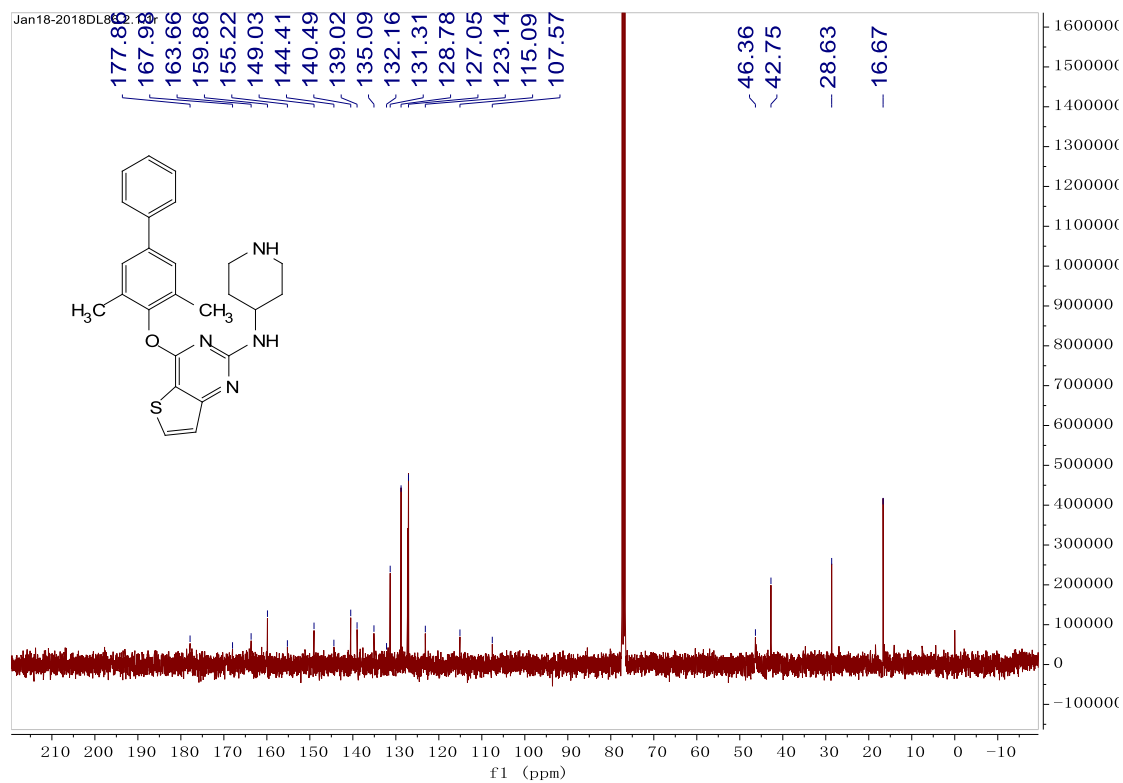

# 10f <sup>1</sup>H NMR

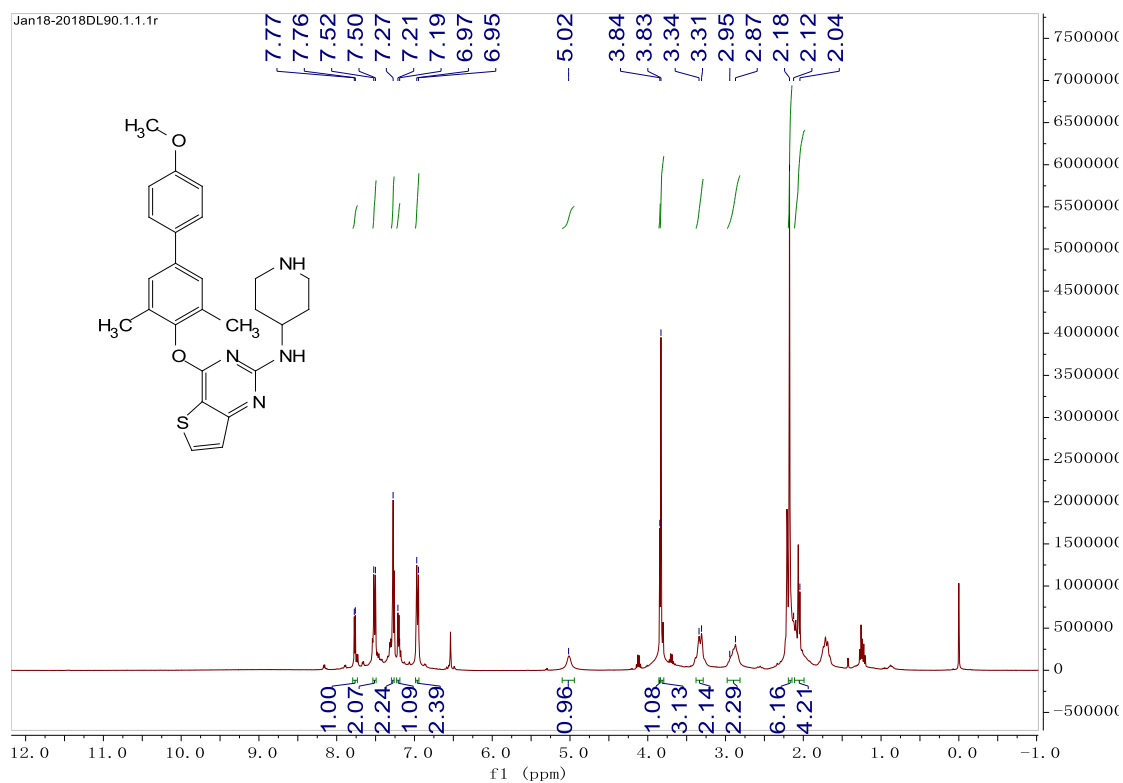

# 10f <sup>13</sup>C NMR

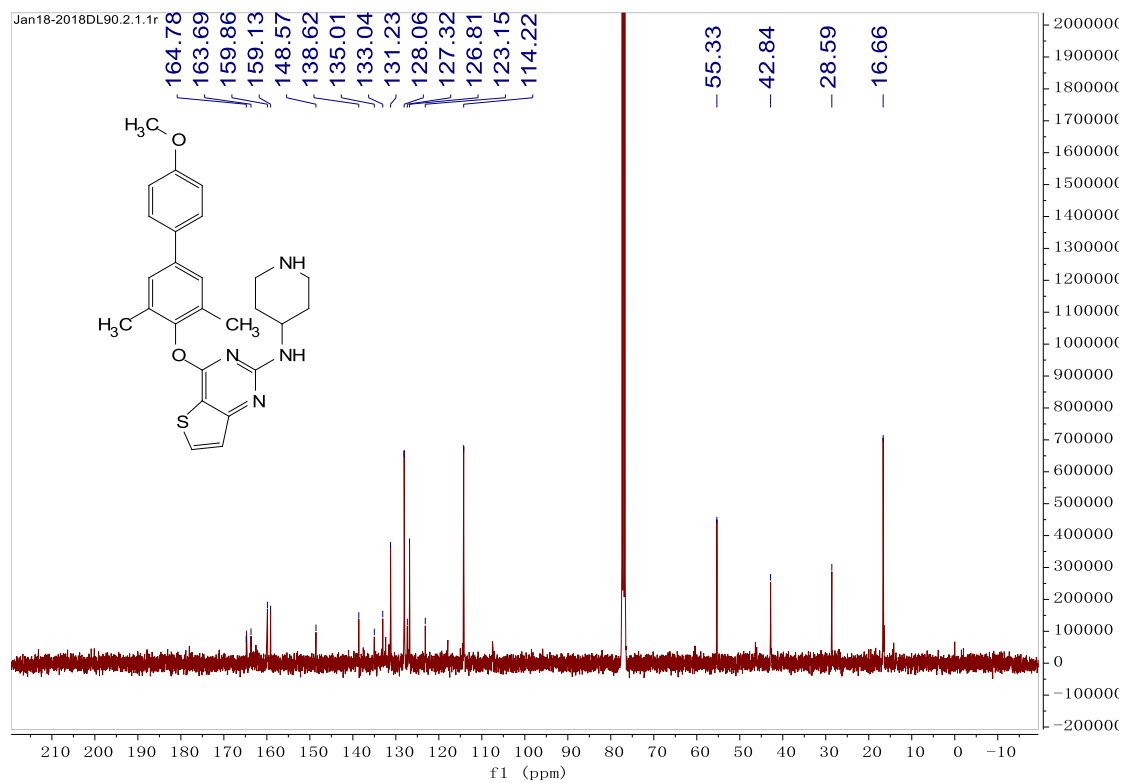

# 11 <sup>1</sup>H NMR

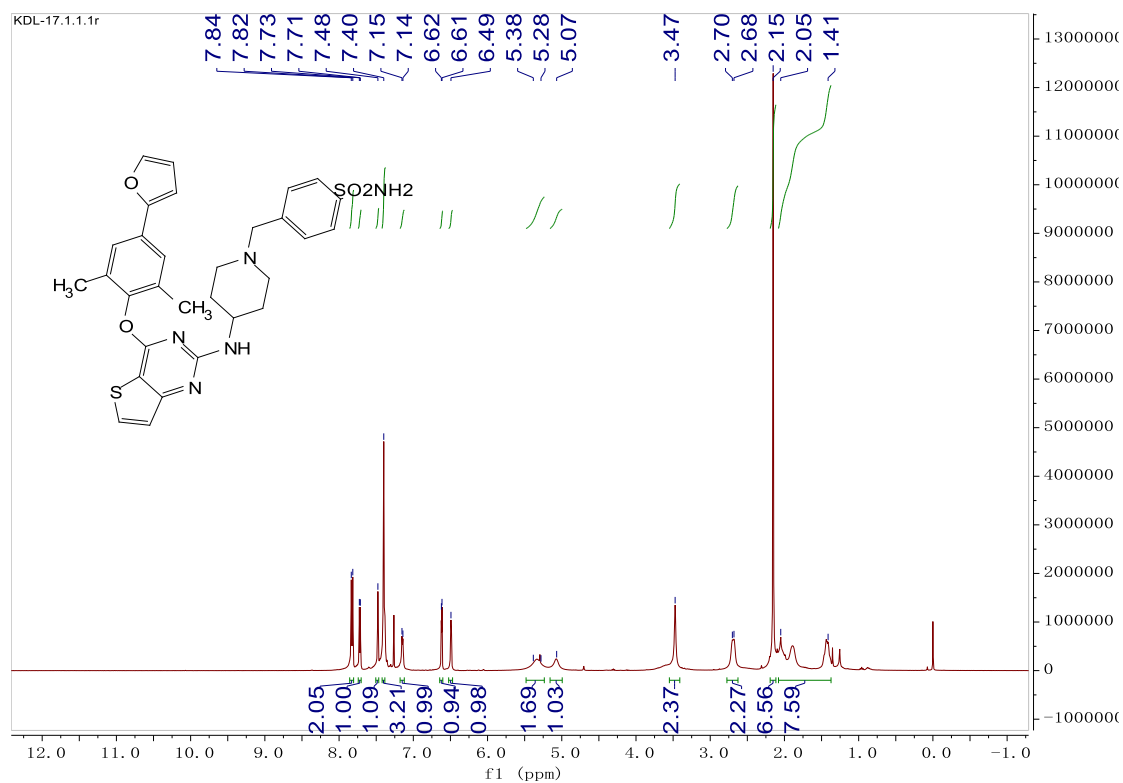

# 11 <sup>13</sup>C NMR

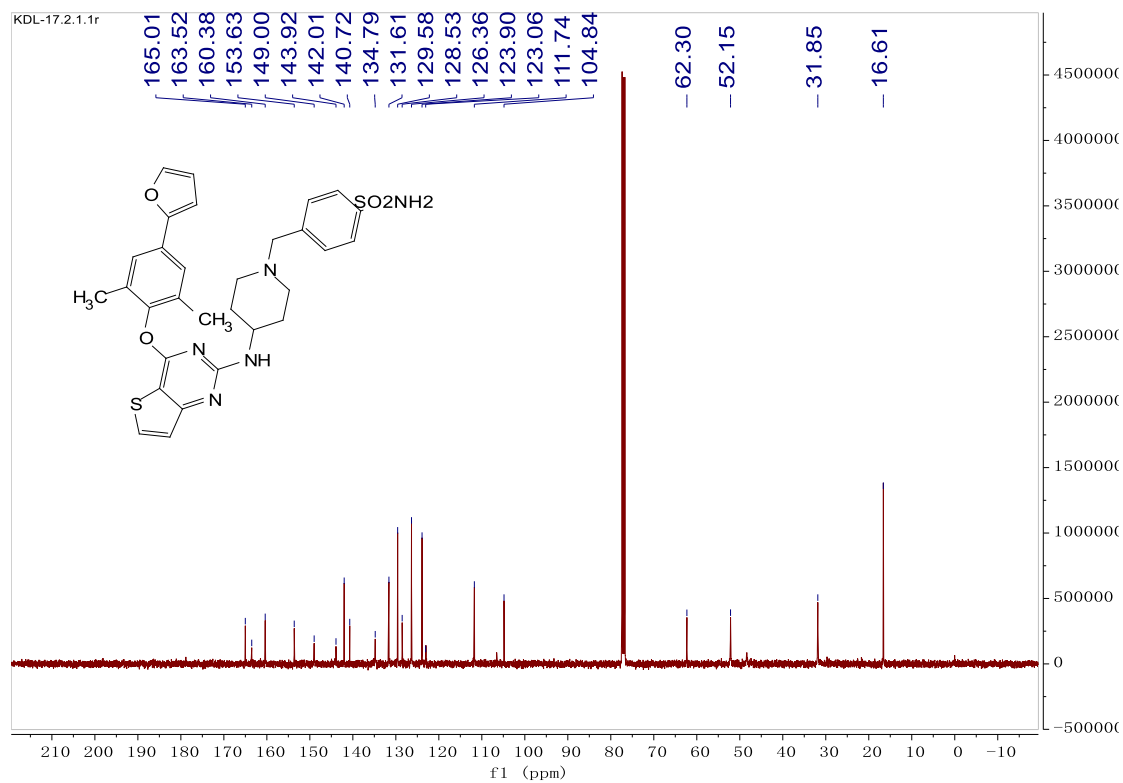

### 13 <sup>1</sup>H NMR

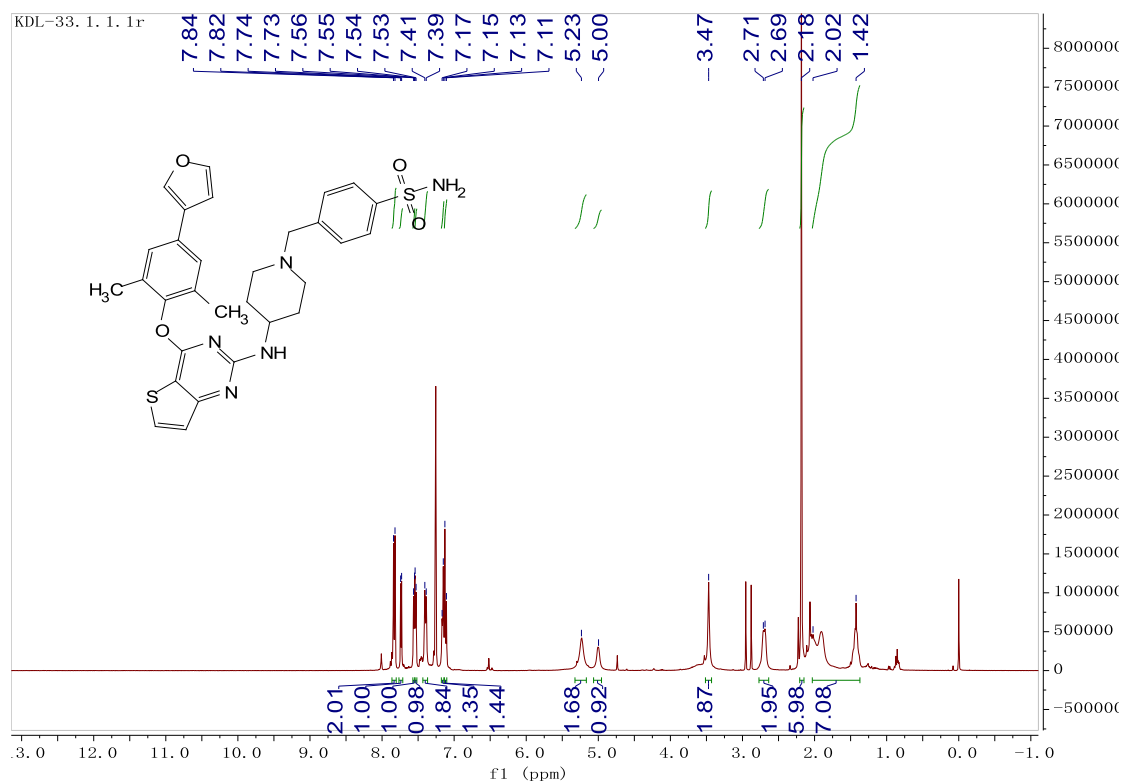

### 13 <sup>13</sup>C NMR

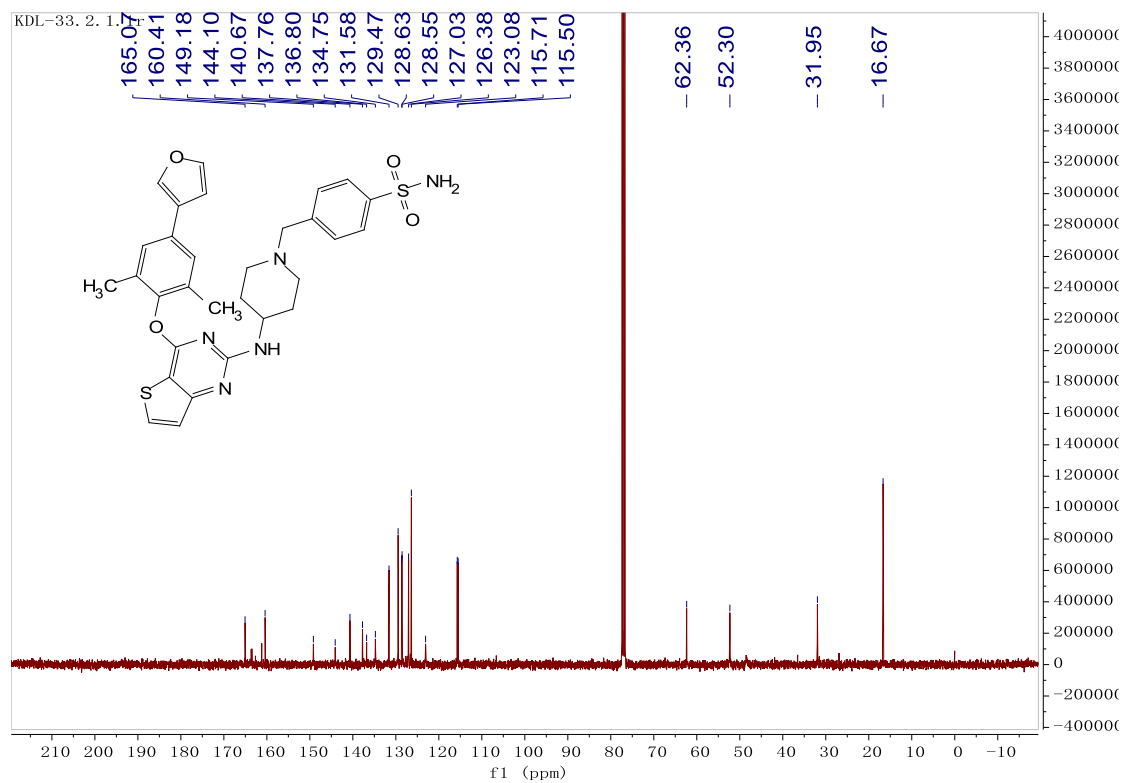

# 14 <sup>1</sup>H NMR

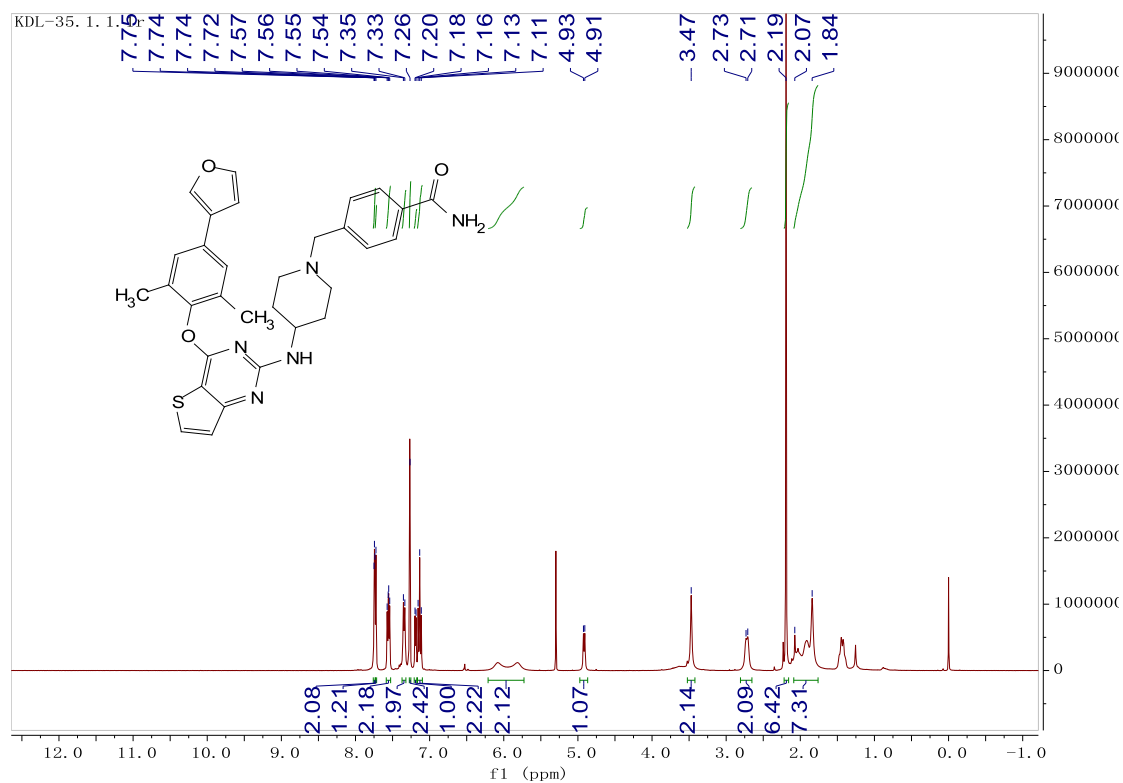

# 14 <sup>13</sup>C NMR

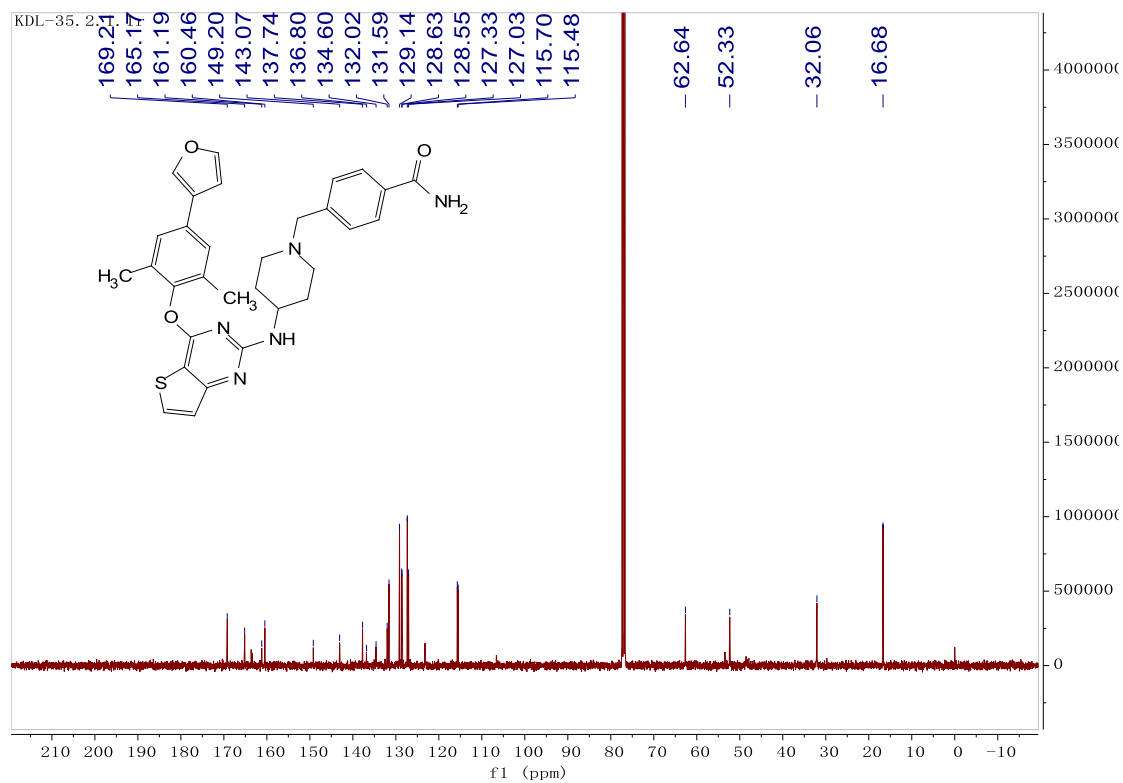

# 17 <sup>1</sup>H NMR

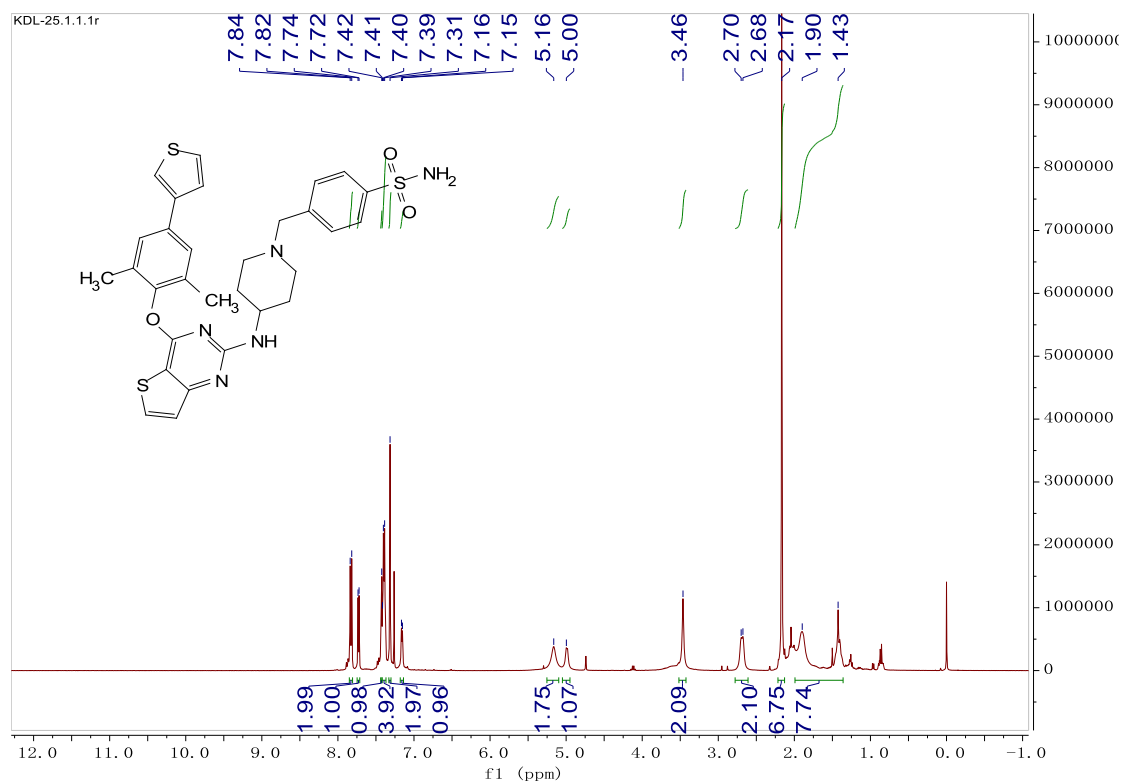

# 17 <sup>13</sup>C NMR

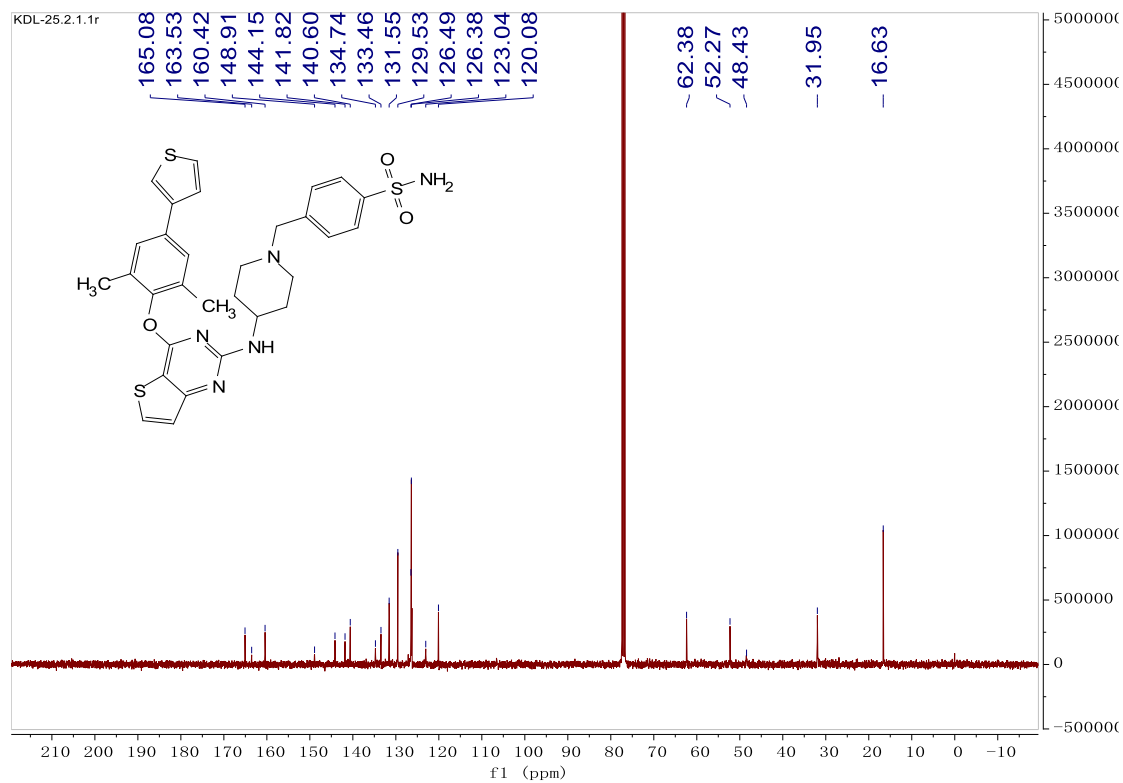

# 18 <sup>1</sup>H NMR

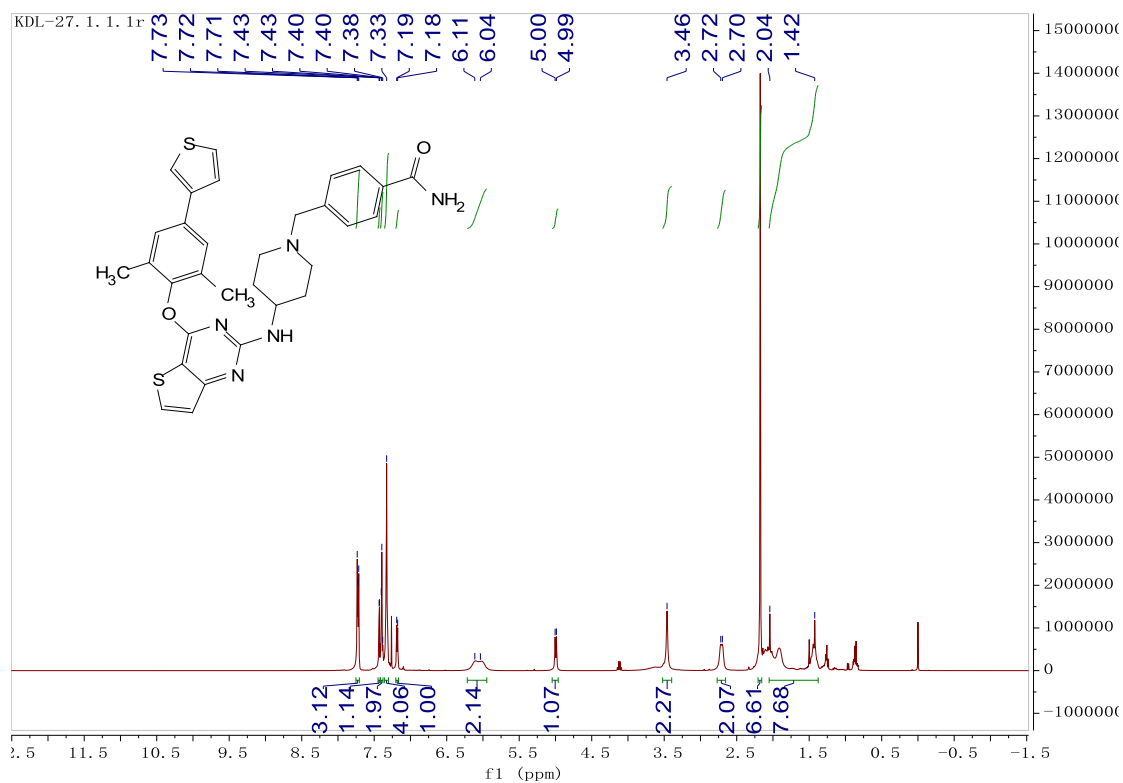

# 18 <sup>13</sup>C NMR

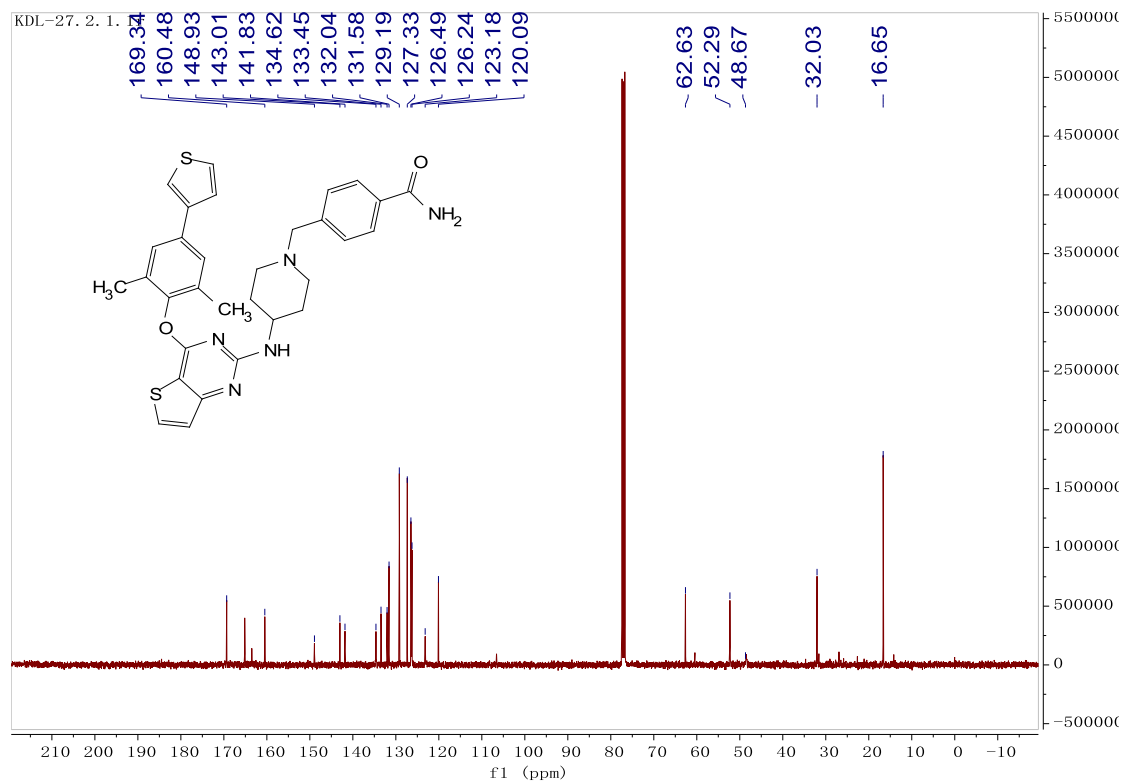



## 20 $^1\text{H}$ NMR

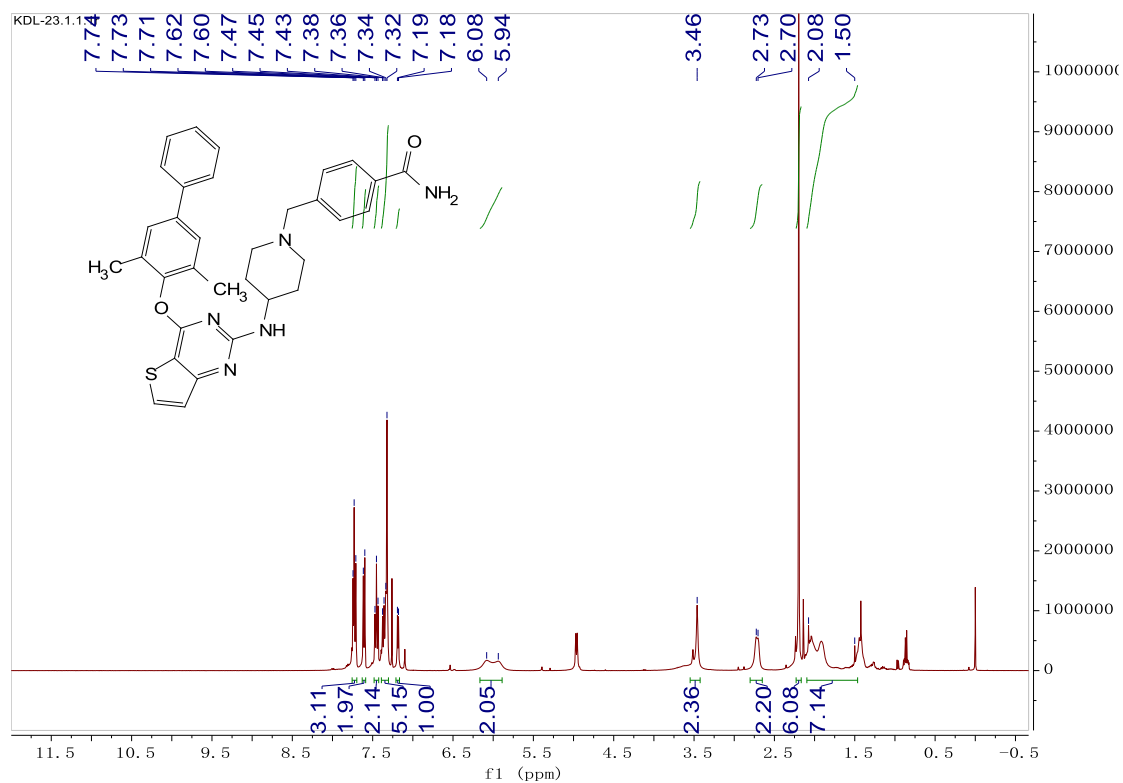

## 20 $^{13}\text{C}$ NMR

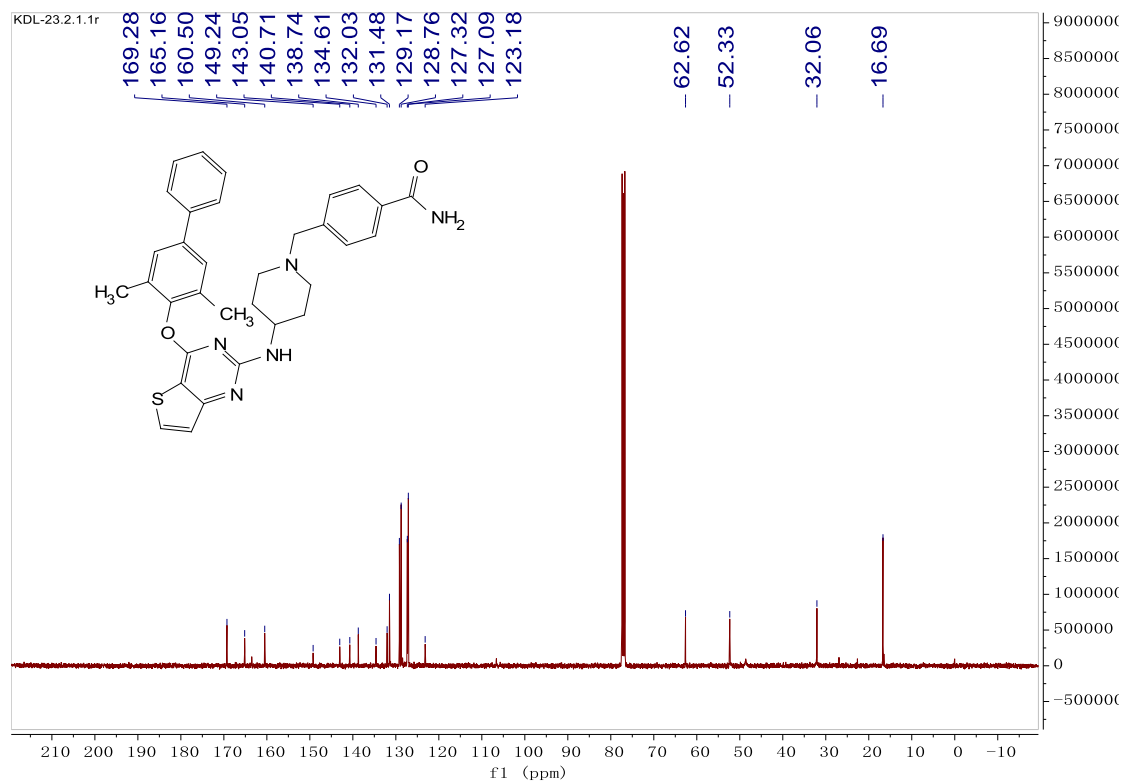

## 23 <sup>1</sup>H NMR

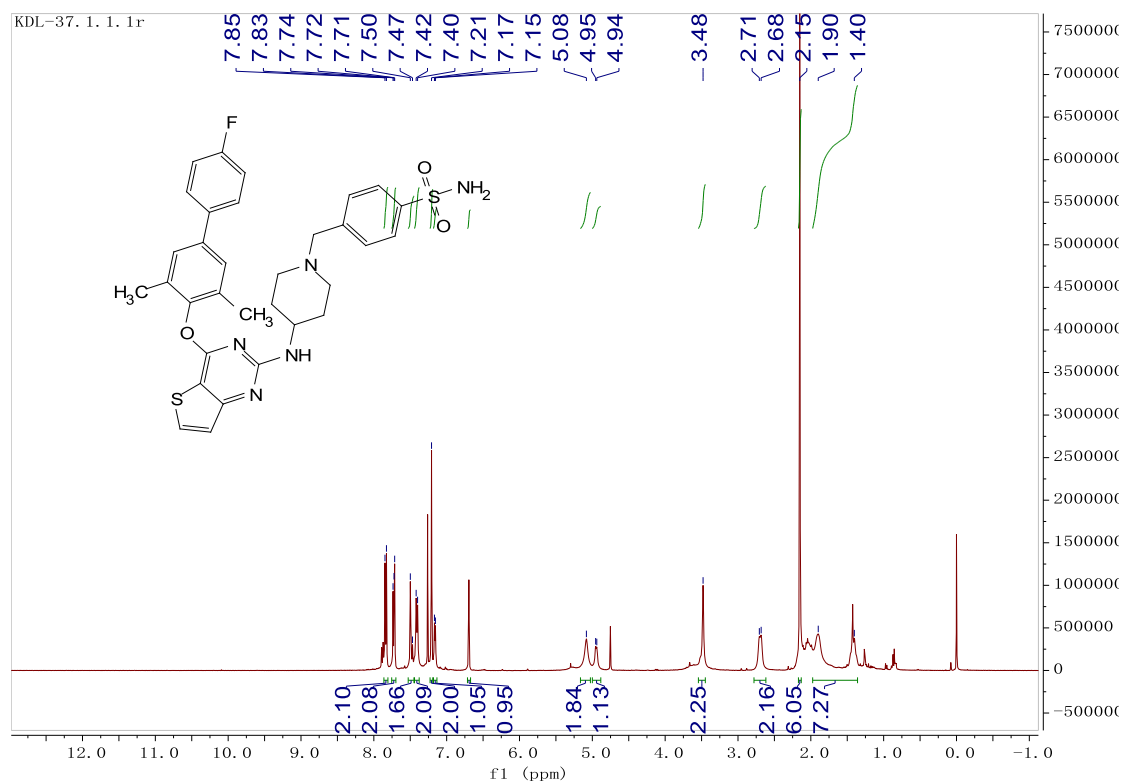

## 23 <sup>13</sup>C NMR

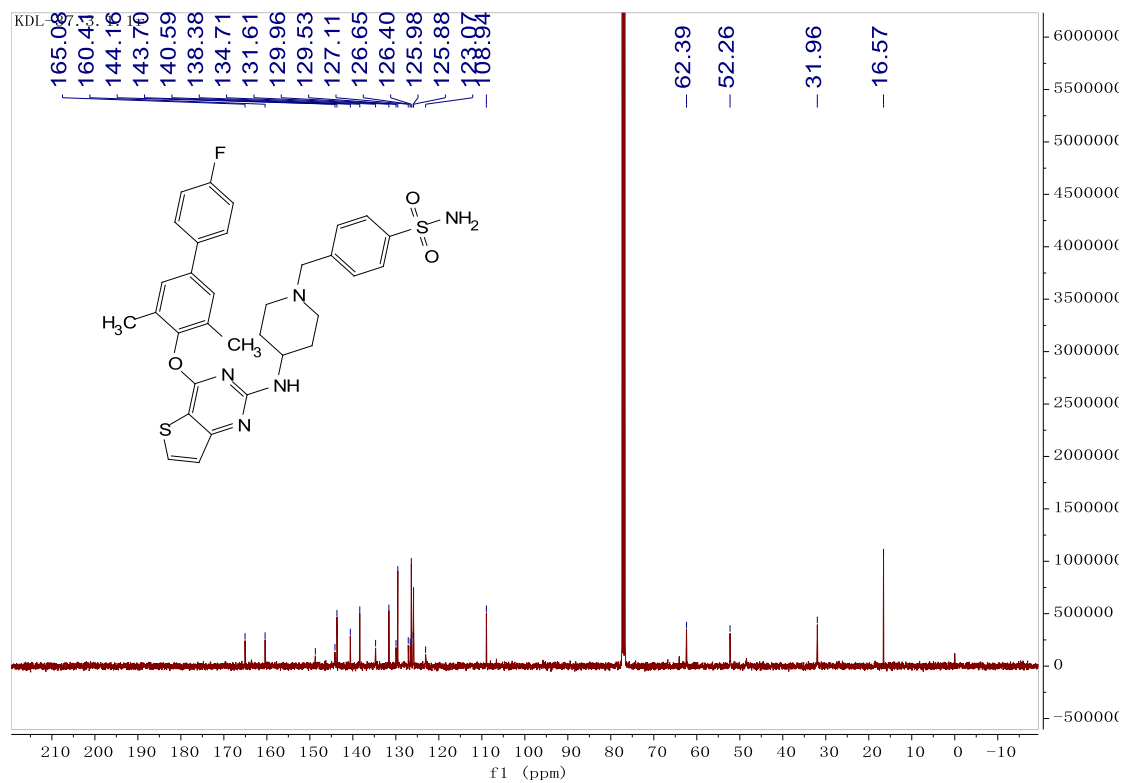

## 24 $^1\text{H}$ NMR

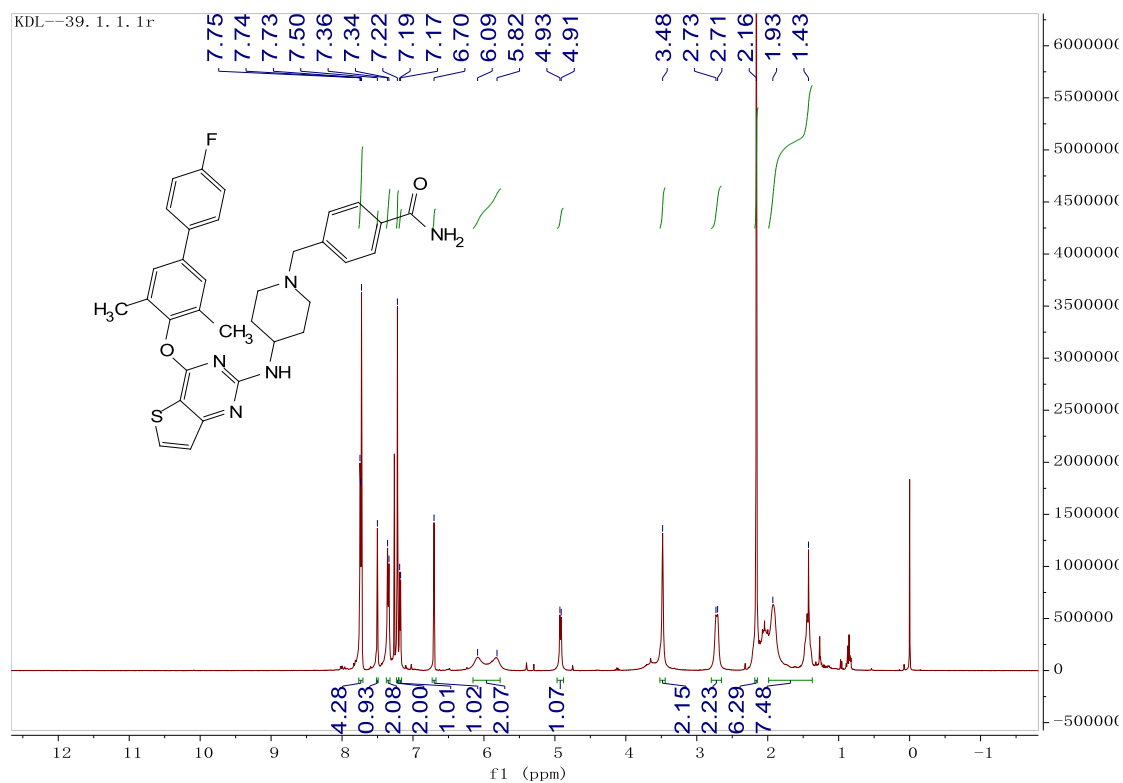

## 24 $^{13}\text{C}$ NMR

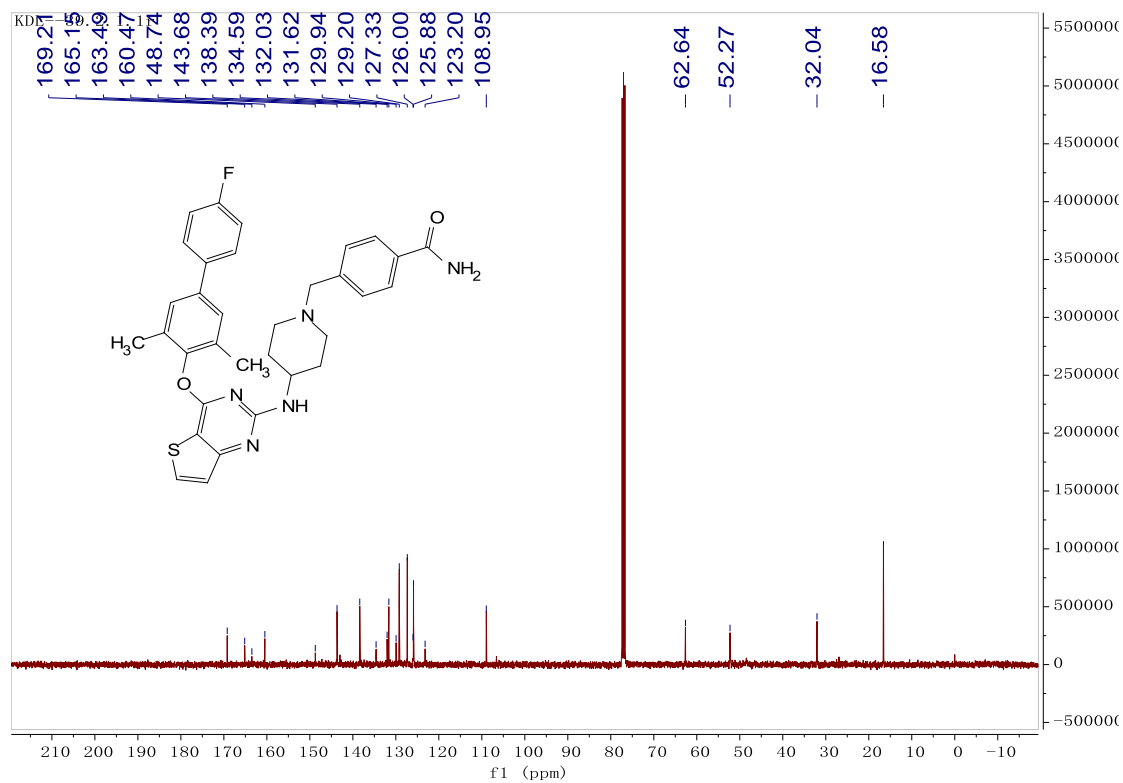

## 26 $^1\text{H}$ NMR

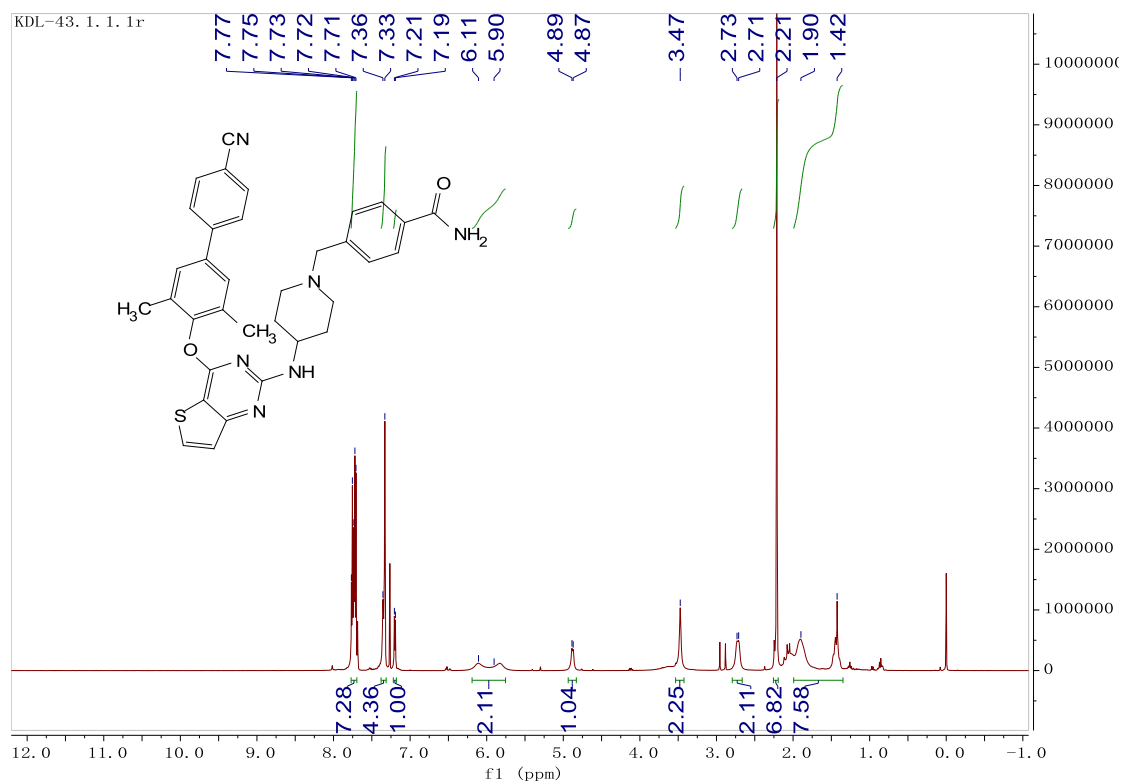

## 26 $^{13}\text{C}$ NMR

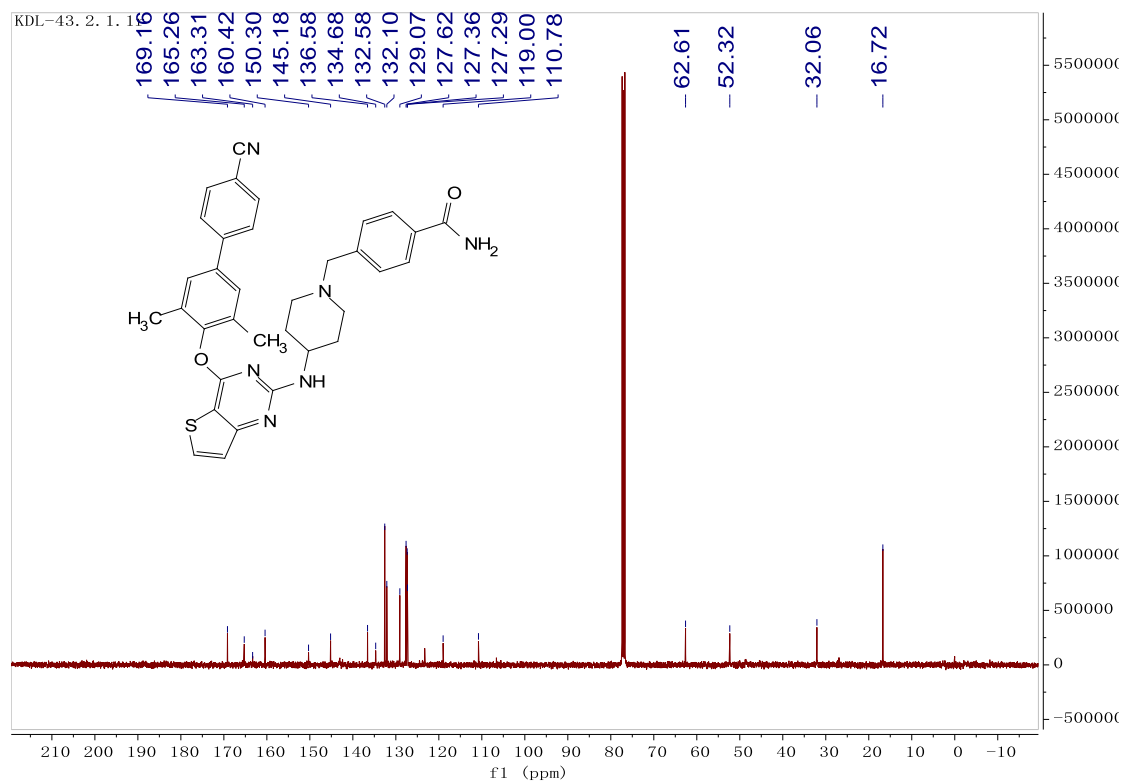

## 28 <sup>1</sup>H NMR

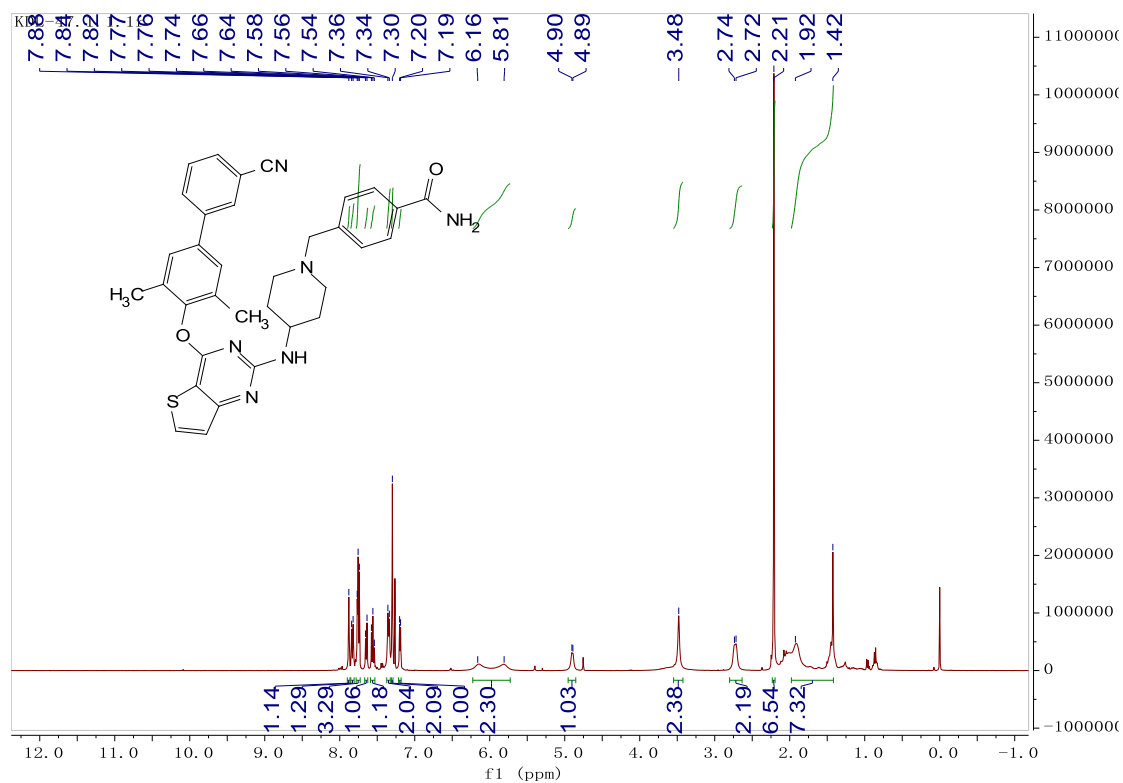

## 28 <sup>13</sup>C NMR

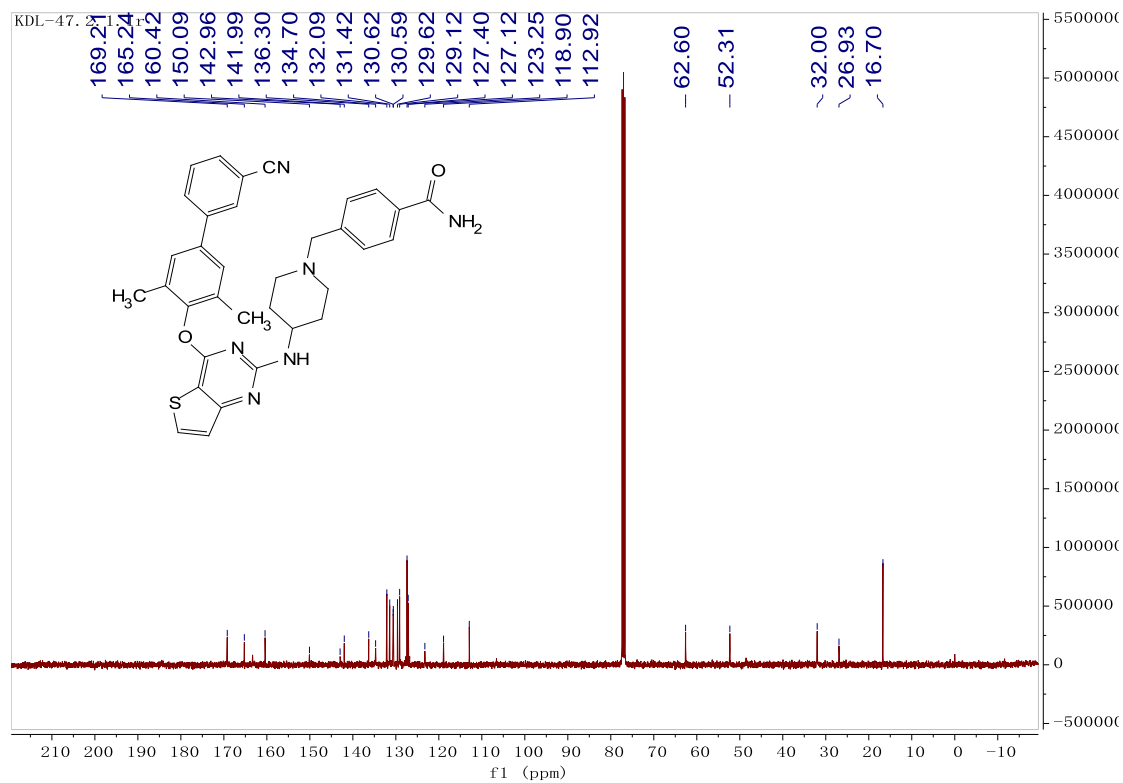

## 4. HPLC spectrum

11

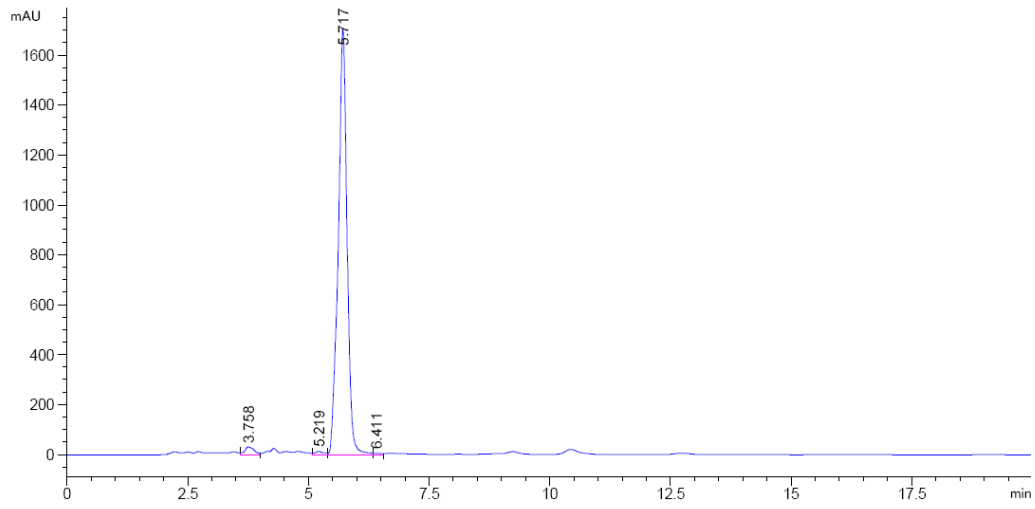

12

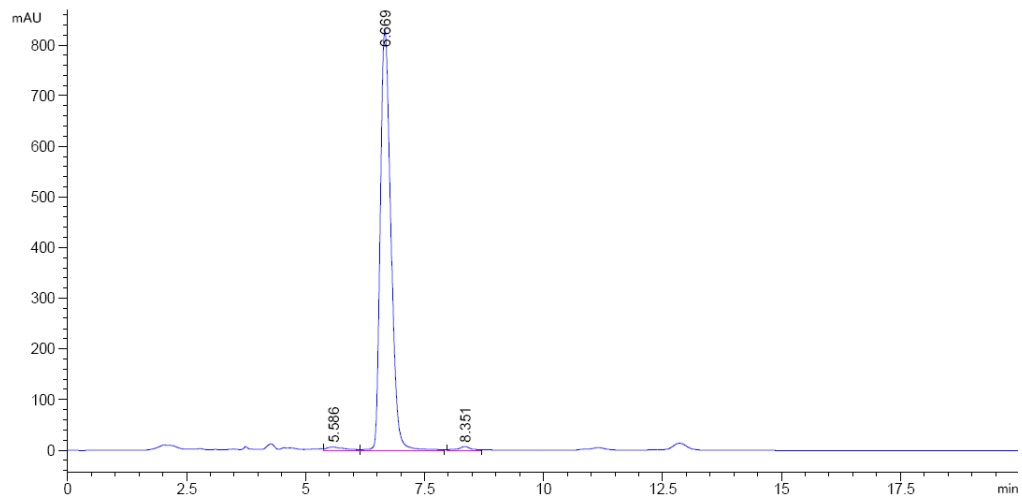

13

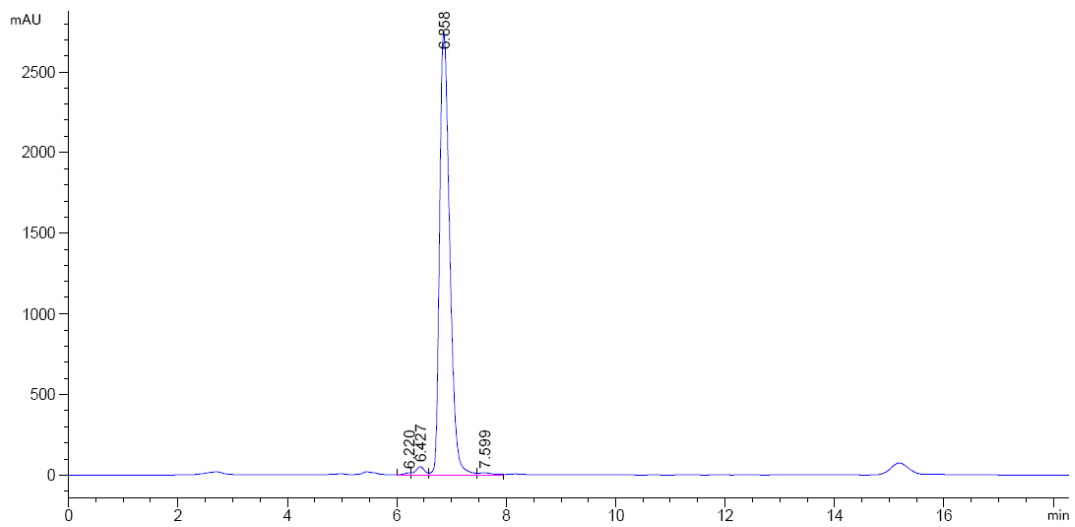

14

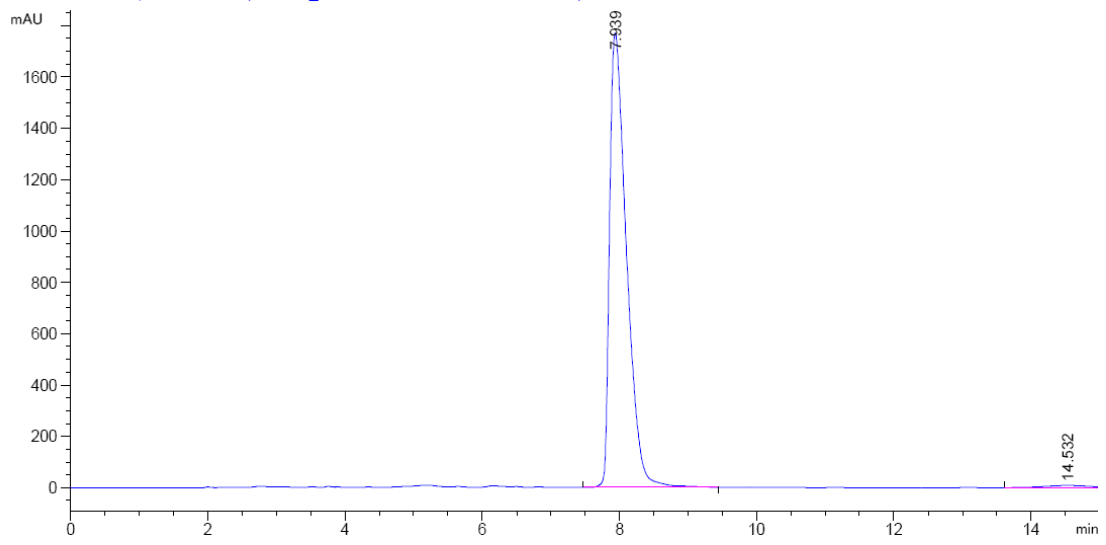

15

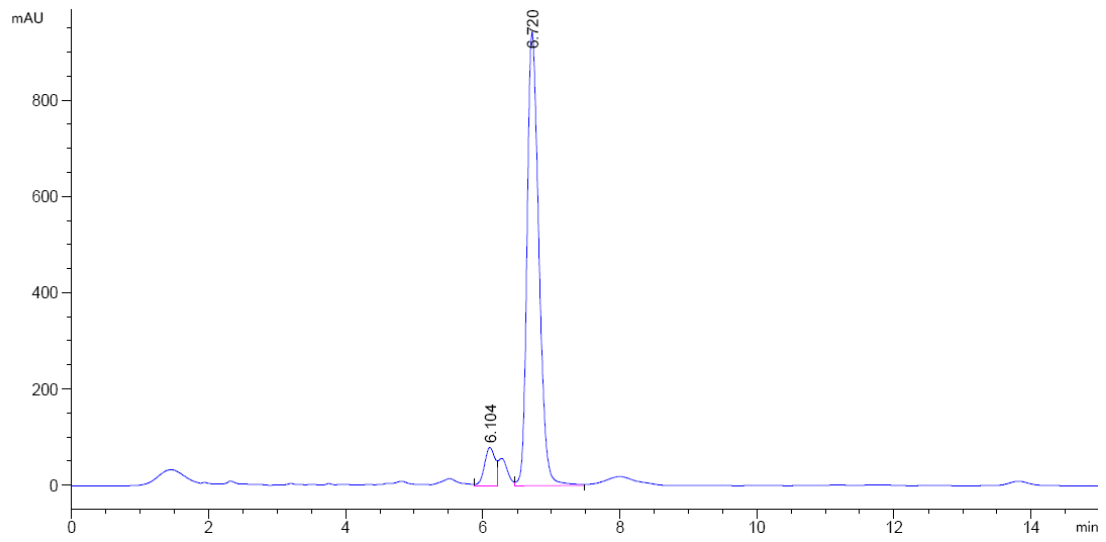

16

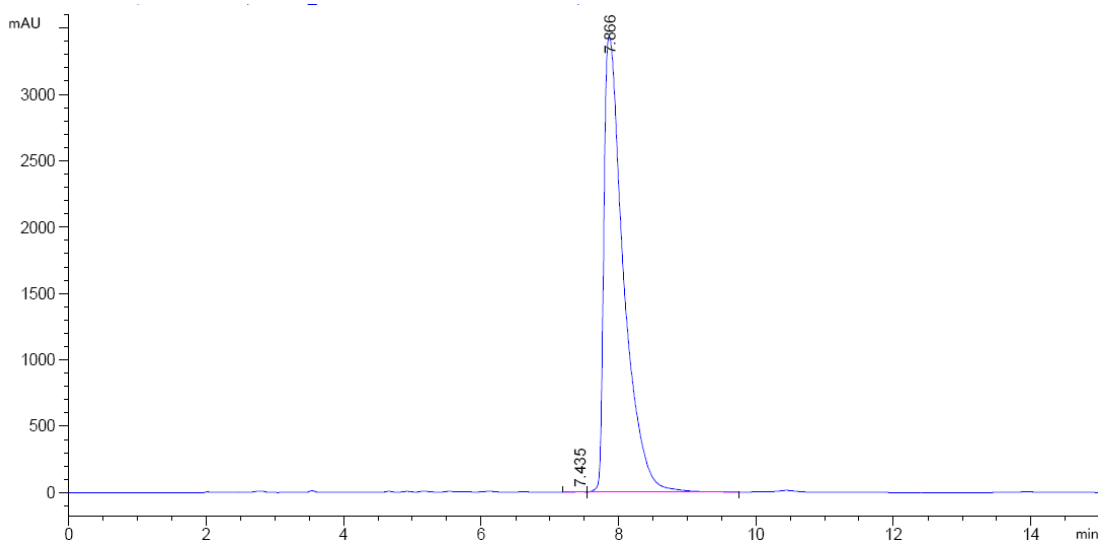

17

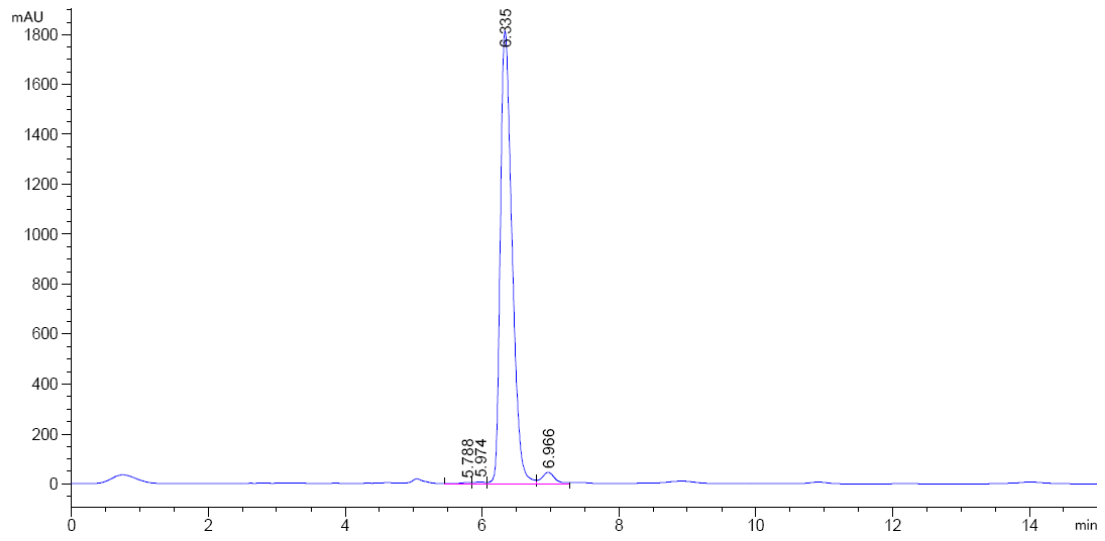

18

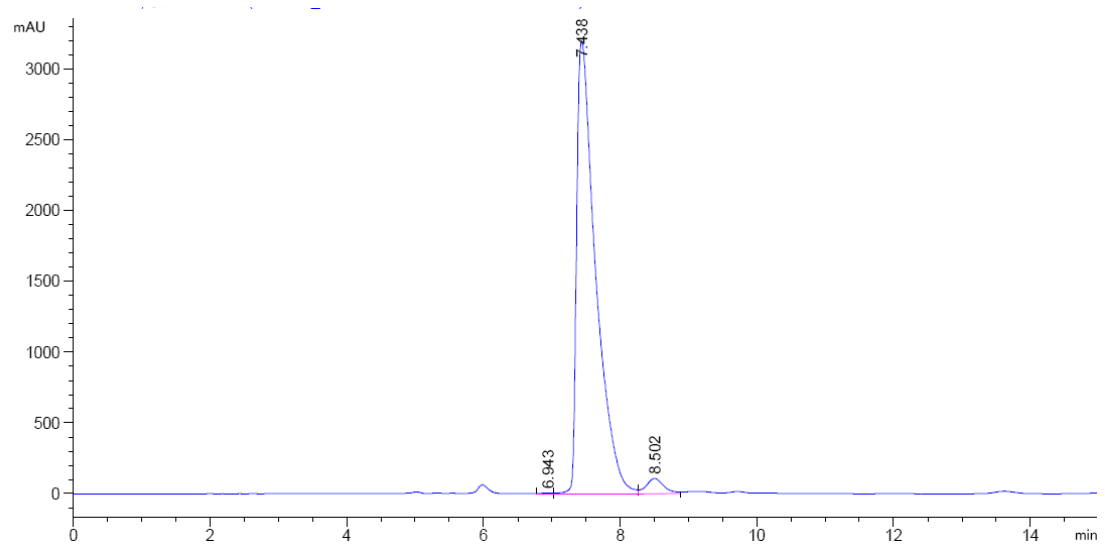

19

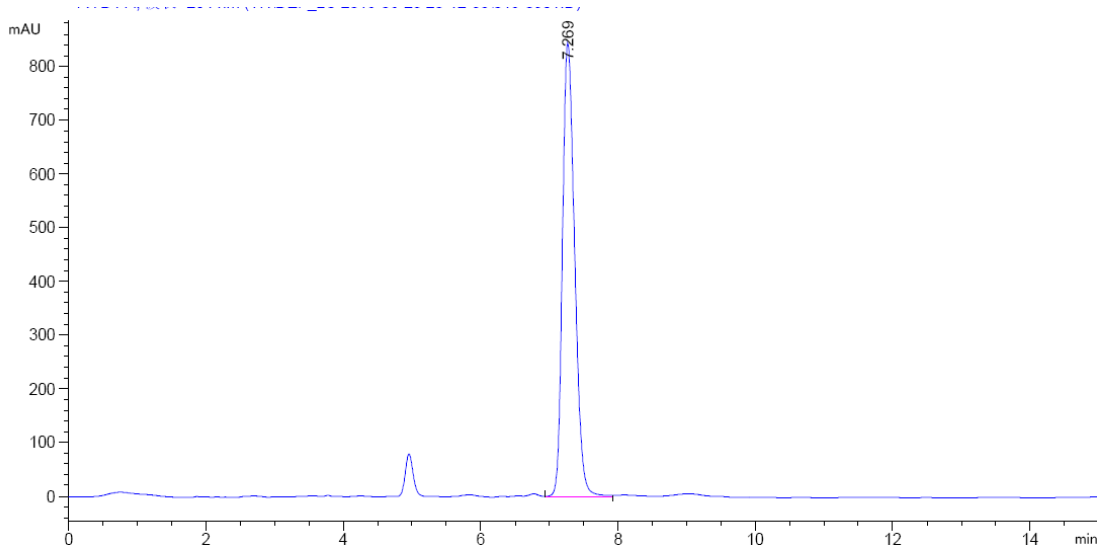



20

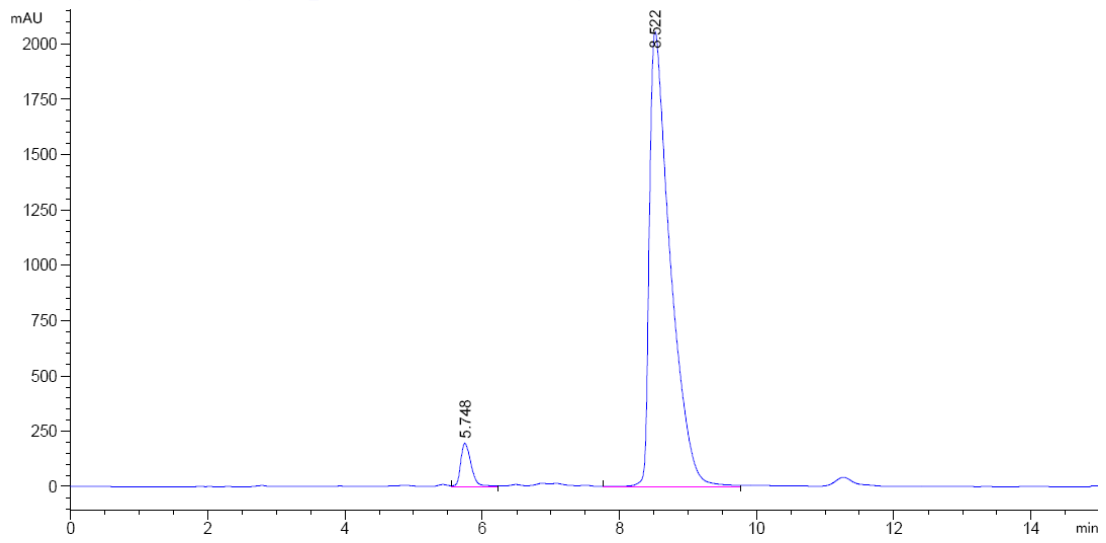

21

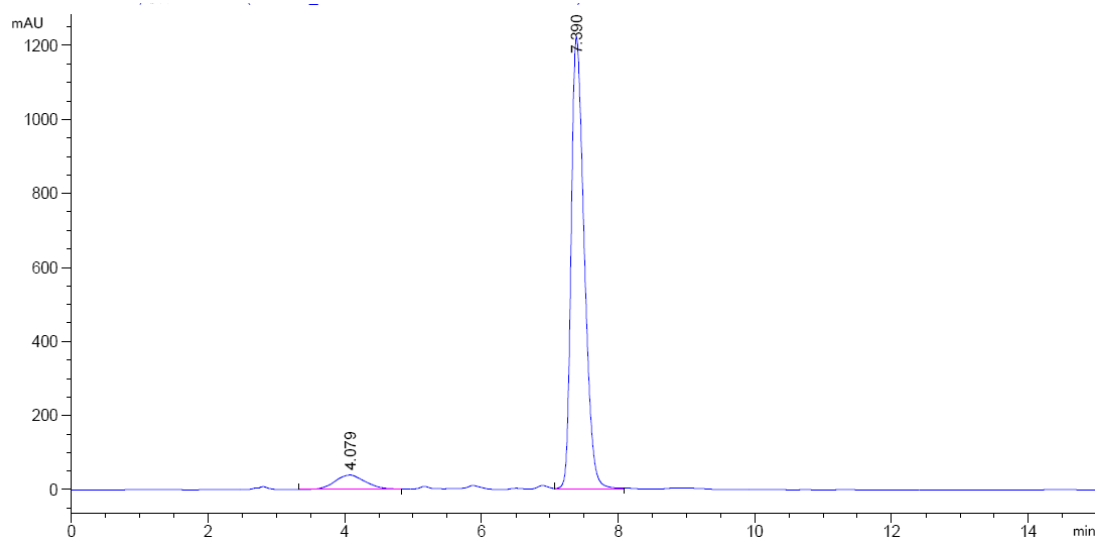

22

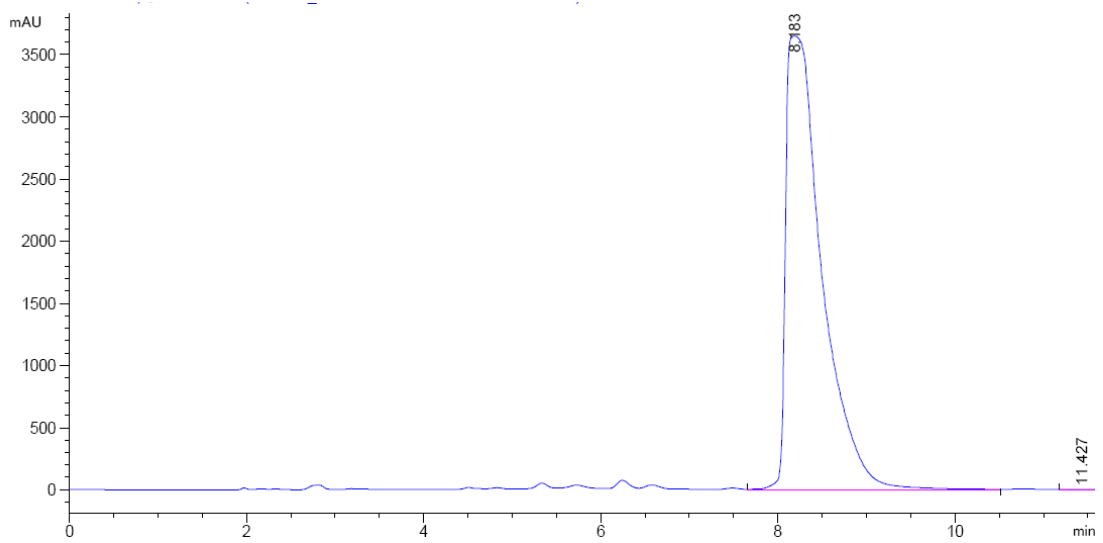

24

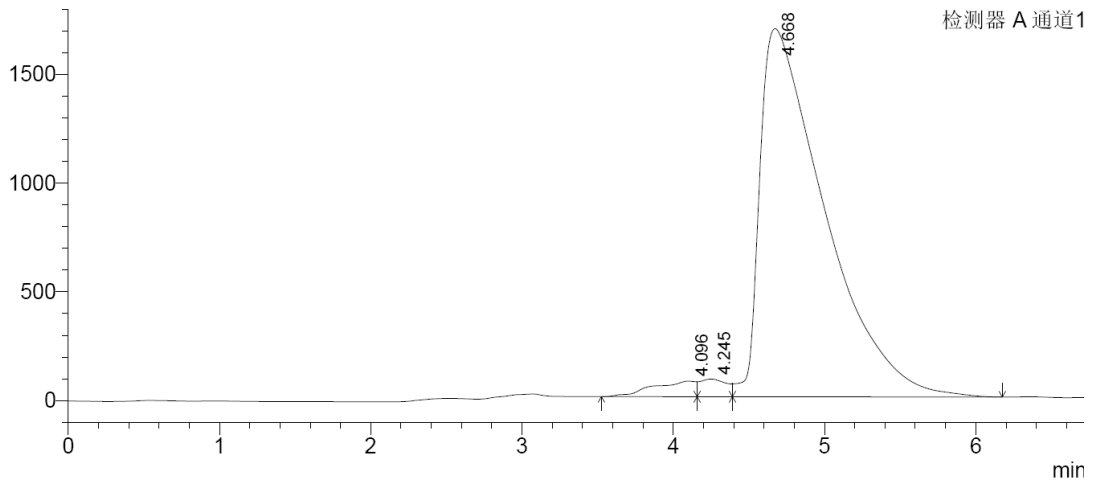

26

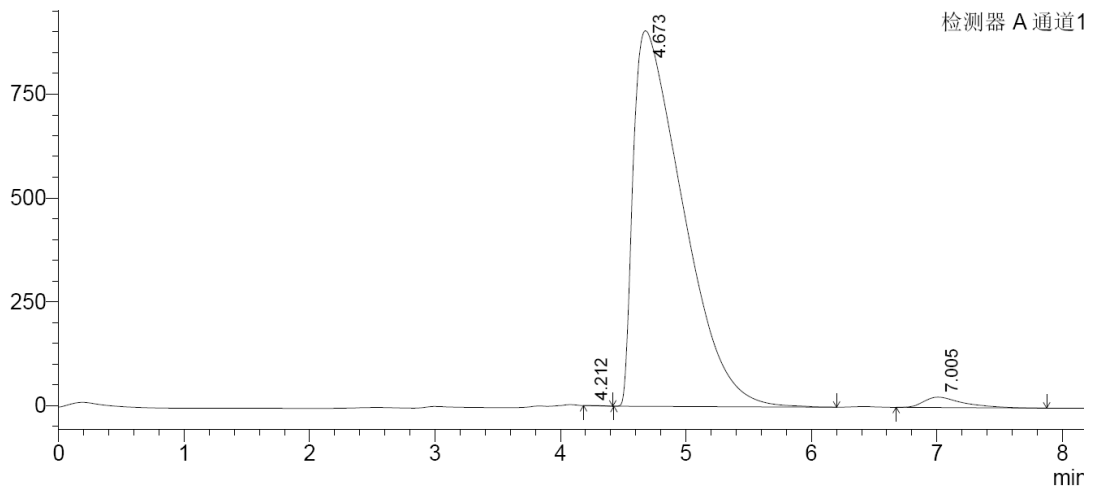

27

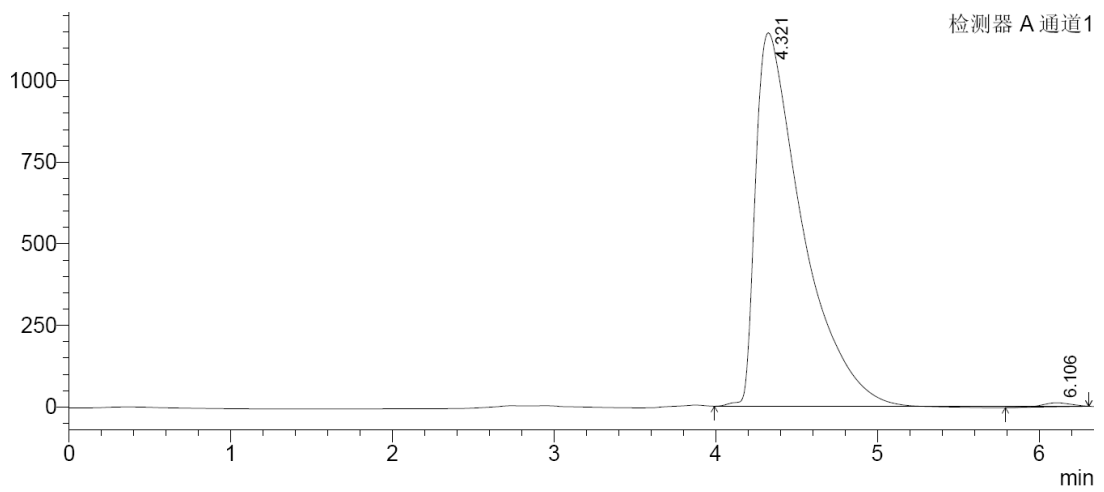

28

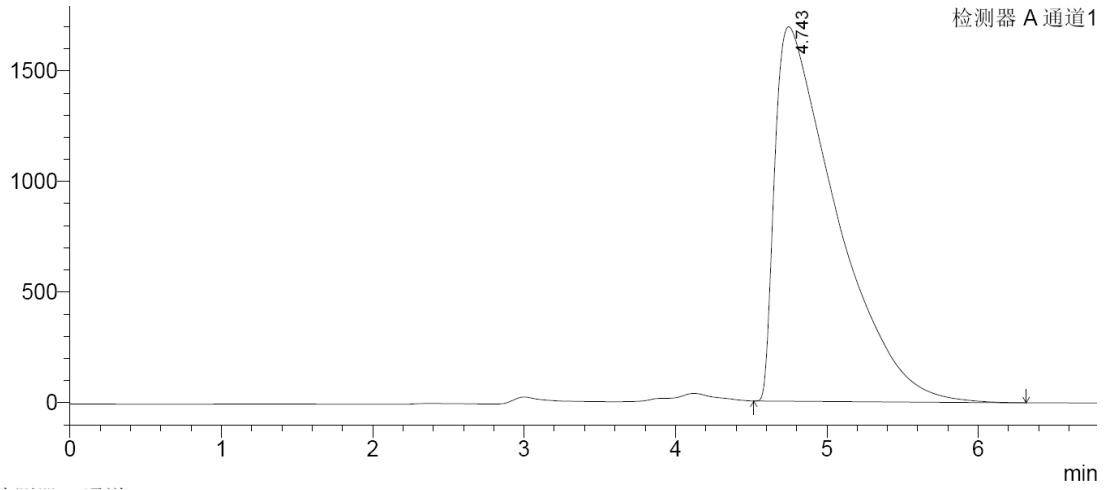

29

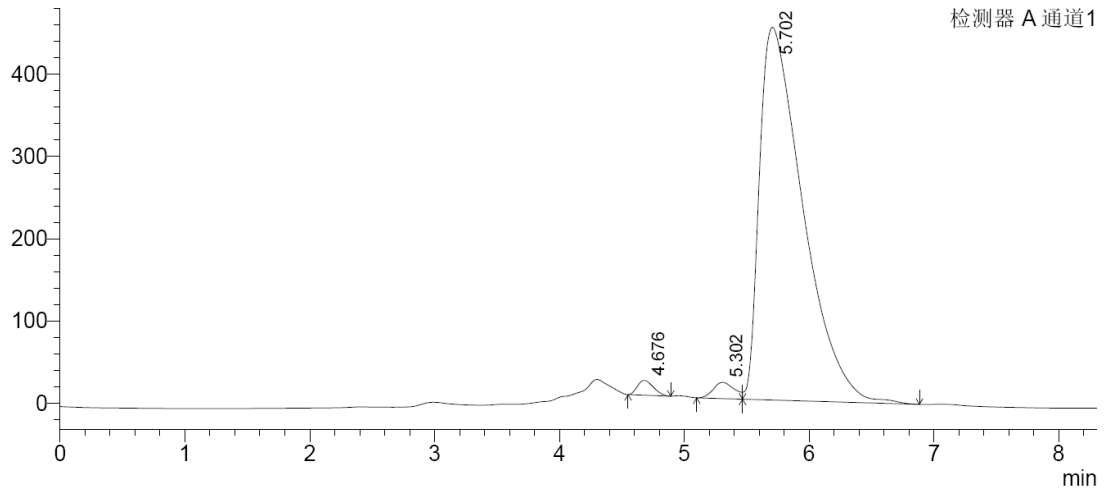

31

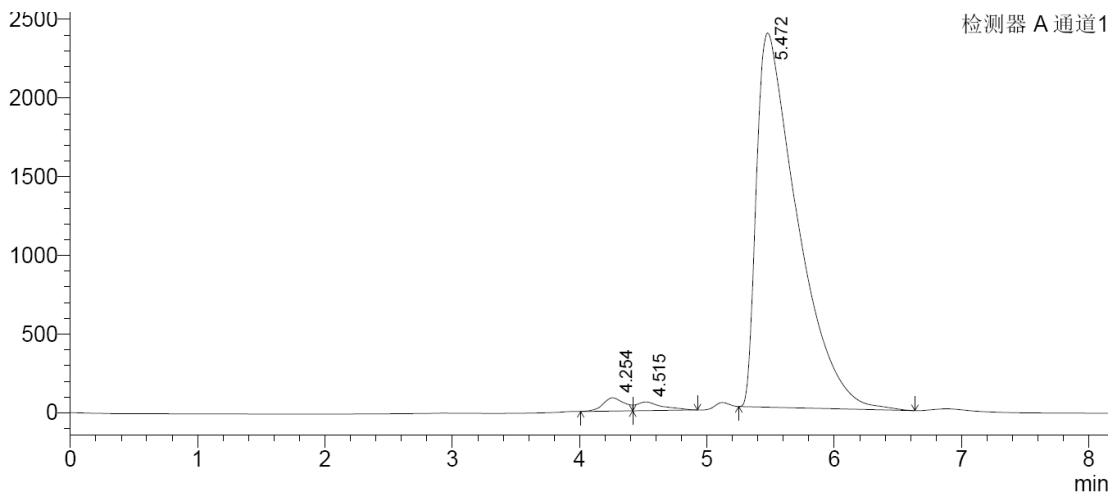

32

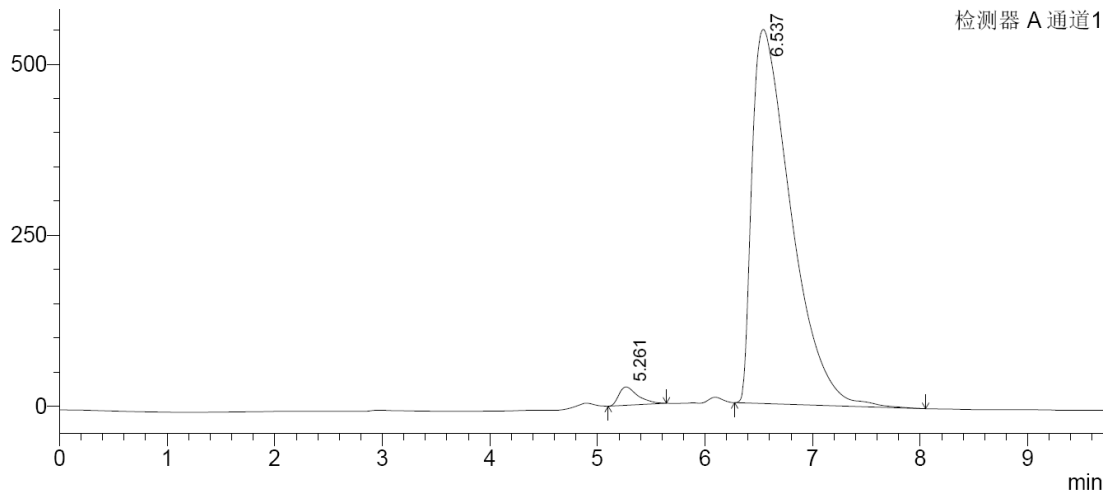

Supplement: mmc1.pdf [file mmc1.pdf]
